# Supplementary material for: The Diversity of Parasitoids and Their Role in the Control of the Siberian Moth, Dendrolimus sibiricus (Lepidoptera: Lasiocampidae), a Major Coniferous Pest in Northern Asia
Source: MDPI journal article supplement (doi:10.3390/life14020268), 2024-02-17
Supplement: s1 [file s1]

# The Parasitoid Diversity and Their Role in the Control of the Siberian Moth, *Dendrolimus sibiricus* (Lepidoptera: Lasiocampidae), a Major Coniferous Pest in Northern Asia

Natalia I. Kirichenko, Alexander A. Ageev, Sergey A. Astapenko, Anna N. Golovina, Dmitry R. Kasparyan, Oksana V. Kosheleva, Alexander V. Timokhov, Ekaterina V. Tselikh, Evgeny V. Zakharov, Dmitrii L. Musolin, Sergey A. Belokobylskij

**Table S1.** The specimens of parasitoids reared from *Dendrolimus sibiricus* in Siberia (Russia) in 2018–2022 and the DNA barcodes of parasitoids borrowed from BOLD or GenBank for comparison.

| No.                | Sample ID | Family     | Species             | Country | Administrative region* | District            | Collection Date | Collectors     | Process ID  | GenBank Accession Number |
|--------------------|-----------|------------|---------------------|---------|------------------------|---------------------|-----------------|----------------|-------------|--------------------------|
| ORIGINAL SEQUENCES |           |            |                     |         |                        |                     |                 |                |             |                          |
| HYMENOPTERA        |           |            |                     |         |                        |                     |                 |                |             |                          |
| 1                  | NK1517    | Braconidae | Aleiodes esenbeckii | Russia  | Krasnoyarsk Terr.      | Irbeiskiy district  | 30.IV.2020      | Golovina A.N.  | DSPAR033-22 | OR732445                 |
| 2                  | NK1516    | Braconidae | Aleiodes esenbeckii | Russia  | Krasnoyarsk Terr.      | Irbeiskiy district  | 30.IV.2020      | Golovina A.N.  | DSPAR032-22 | OR732433                 |
| 3                  | NK1514    | Braconidae | Aleiodes esenbeckii | Russia  | Krasnoyarsk Terr.      | Irbeiskiy district  | 30.IV.2020      | Golovina A.N.  | DSPAR030-22 | OR732450                 |
| 4                  | NK1513    | Braconidae | Aleiodes esenbeckii | Russia  | Tomsk Prov.            | Shegarskiy district | 19.IX.2018      | Astapenko S.A. | DSPAR029-22 | OR732462                 |
| 5                  | NK1512    | Braconidae | Aleiodes esenbeckii | Russia  | Tomsk Prov.            | Shegarskiy district | 19.IX.2018      | Astapenko S.A. | DSPAR028-22 | OR732463                 |
| 6                  | NK1511    | Braconidae | Aleiodes esenbeckii | Russia  | Irkutsk Prov.          | Kachugskiy district | 28.VII.2020     | Ageev A.A      | DSPAR027-22 | OR732438                 |
| 7                  | NK1510    | Braconidae | Aleiodes esenbeckii | Russia  | Tomsk Prov.            | Shegarskiy district | 19.IX.2018      | Astapenko S.A. | DSPAR026-22 | OR732424                 |
| 8                  | NK1509    | Braconidae | Aleiodes esenbeckii | Russia  | Tomsk Prov.            | Shegarskiy district | 19.IX.2018      | Astapenko S.A. | DSPAR025-22 | OR732431                 |

| No. | Sample ID | Family     | Species                  | Country | Administrative region* | District            | Collection Date | Collectors     | Process ID  | GenBank Accession Number |
|-----|-----------|------------|--------------------------|---------|------------------------|---------------------|-----------------|----------------|-------------|--------------------------|
| 9   | NK1508    | Braconidae | Aleiodes esenbeckii      | Russia  | Tomsk Prov.            | Shegarskiy district | 19.IX.2018      | Astapenko S.A. | DSPAR024-22 | OR732439                 |
| 10  | NK1501    | Braconidae | Aleiodes esenbeckii      | Russia  | Krasnoyarsk Terr.      | Irbeiskiy district  | 15.VI.2021      | Astapenko S.A. | DSPAR017-22 | OR732425                 |
| 11  | NK1500    | Braconidae | Aleiodes esenbeckii      | Russia  | Krasnoyarsk Terr.      | Irbeiskiy district  | 15.VI.2021      | Astapenko S.A. | DSPAR016-22 | OR732423                 |
| 12  | NK1499    | Braconidae | Aleiodes esenbeckii      | Russia  | Tomsk Prov.            | Asinovskiy district | 21.IX.2018      | Ageev A.A      | DSPAR015-22 | OR732429                 |
| 13  | NK1487    | Braconidae | Aleiodes esenbeckii      | Russia  | Krasnoyarsk Terr.      | Irbeiskiy district  | 26.VIII.2019    | Astapenko S.A. | DSPAR003-22 | OR732461                 |
| 14  | NK1507    | Braconidae | Cotesia ordinaria        | Russia  | Irkutsk Prov.          | Kachugskiy district | 16.VII.2021     | Ageev A.A      | DSPAR023-22 | OR732422                 |
| 15  | NK1506    | Braconidae | Cotesia ordinaria        | Russia  | Irkutsk Prov.          | Kachugskiy district | 16.VII.2021     | Ageev A.A      | DSPAR022-22 | OR732437                 |
| 16  | NK1505    | Braconidae | Cotesia ordinaria        | Russia  | Krasnoyarsk Terr.      | Irbeiskiy district  | 15.VI.2021      | Astapenko S.A. | DSPAR021-22 | OR732447                 |
| 17  | NK1504    | Braconidae | Cotesia ordinaria        | Russia  | Krasnoyarsk Terr.      | Irbeiskiy district  | 15.VI.2021      | Astapenko S.A. | DSPAR020-22 | OR732460                 |
| 18  | NK1503    | Braconidae | Cotesia ordinaria        | Russia  | Krasnoyarsk Terr.      | Irbeiskiy district  | 30.IV.2020      | Golovina A.N.  | DSPAR019-22 | OR732459                 |
| 19  | NK1502    | Braconidae | Cotesia ordinaria        | Russia  | Krasnoyarsk Terr.      | Irbeiskiy district  | 30.IV.2020      | Golovina A.N.  | DSPAR018-22 | OR732454                 |
| 20  | NK1490    | Braconidae | Glyptapanteles liparidis | Russia  | Irkutsk Prov.          | Kachugskiy district | 16.VII.2021     | Ageev A.A      | DSPAR006-22 | OR732467                 |
| 21  | NK1489    | Braconidae | Glyptapanteles liparidis | Russia  | Irkutsk Prov.          | Kachugskiy district | 16.VII.2021     | Ageev A.A      | DSPAR005-22 | OR732457                 |
| 22  | NK1493    | Encyrtidae | Ooencyrtus pinicolus     | Russia  | Irkutsk Prov.          | Kachugskiy district | 28.VII.2020     | Ageev A.A      | DSPAR009-22 | OR732420                 |
| 23  | NK1492    | Encyrtidae | Ooencyrtus pinicolus     | Russia  | Irkutsk Prov.          | Kachugskiy district | 28.VII.2020     | Ageev A.A      | DSPAR008-22 | OR732436                 |

| No. | Sample ID | Family        | Species                | Country | Administrative region* | District            | Collection Date | Collectors     | Process ID  | GenBank Accession Number |
|-----|-----------|---------------|------------------------|---------|------------------------|---------------------|-----------------|----------------|-------------|--------------------------|
| 24  | NK1573    | Encyrtidae    | Ooencyrtus pinicolus   | Russia  | Tyva Rep.              | Targalovka location | 09.VIII.1963    | Kondakov Yu.P. | DSPAR089-22 | OR732426                 |
| 25  | NK1570    | Encyrtidae    | Ooencyrtus pinicolus   | Russia  | Tyva Rep.              | Targalovka location | 09.VIII.1963    | Kondakov Yu.P. | DSPAR086-22 | OR732444                 |
| 26  | NK1568    | Encyrtidae    | Ooencyrtus pinicolus   | Russia  | Tyva Rep.              | Targalovka location | 09.VIII.1963    | Kondakov Yu.P. | DSPAR084-22 | OR732442                 |
| 27  | NK1563    | Encyrtidae    | Ooencyrtus pinicolus   | Russia  | Tyva Rep.              | Targalovka location | 09.VIII.1963    | Kondakov Yu.P. | DSPAR079-22 | OR732458                 |
| 28  | NK1486    | Ichneumonidae | Habronyx heros         | Russia  | Krasnoyarsk Terr.      | Irbeiskiy district  | 06.IX.2019      | Astapenko S.A. | DSPAR002-22 | OR732464                 |
| 29  | NK1498    | Ichneumonidae | Hyposoter validus      | Russia  | Tomsk Prov.            | Asinovskiy district | 21.IX.2018      | Ageev A.A      | DSPAR014-22 | OR732452                 |
| 30  | NK1488    | Ichneumonidae | Hyposoter validus      | Russia  | Tomsk Prov.            | Asinovskiy district | 21.IX.2018      | Ageev A.A      | DSPAR004-22 | OR732449                 |
| 31  | NK1515    | Perilampidae  | Perilampus nitens      | Russia  | Krasnoyarsk Terr.      | Irbeiskiy district  | 15.VII.2020     | Ageev A.A      | DSPAR031-22 | OR732441                 |
| 32  | NK1524    | Pteromalidae  | Pachyneuron solitarium | Russia  | Irkutsk Prov.          | Kachugskiy district | 29.VII.2020     | Astapenko S.A. | DSPAR040-22 | OR732430                 |
| 33  | NK1494    | Pteromalidae  | Pachyneuron solitarium | Russia  | Irkutsk Prov.          | Kachugskiy district | 28.VII.2020     | Ageev A.A      | DSPAR010-22 | OR732440                 |
| 34  | NK1491    | Pteromalidae  | Pachyneuron solitarium | Russia  | Irkutsk Prov.          | Kachugskiy district | 28.VII.2020     | Ageev A.A      | DSPAR007-22 | OR732443                 |
| 35  | NK1523    | Scelionidae   | Telenomus tetratomus   | Russia  | Irkutsk Prov.          | Kachugskiy district | 28.VII.2020     | Astapenko S.A. | DSPAR039-22 | OR732427                 |
| 36  | NK1518    | Scelionidae   | Telenomus tetratomus   | Russia  | Irkutsk Prov.          | Kachugskiy district | 28.VII.2020     | Ageev A.A      | DSPAR034-22 | OR732448                 |
| 37  | NK1497    | Scelionidae   | Telenomus tetratomus   | Russia  | Irkutsk Prov.          | Kachugskiy district | 28.VII.2020     | Ageev A.A      | DSPAR013-22 | OR732428                 |
| 38  | NK1496    | Scelionidae   | Telenomus tetratomus   | Russia  | Irkutsk Prov.          | Kachugskiy district | 28.VII.2020     | Ageev A.A      | DSPAR012-22 | OR732446                 |

| No.                                            | Sample ID   | Family            | Species                 | Country        | Administrative region* | District            | Collection Date | Collectors     | Process ID    | GenBank Accession Number |
|------------------------------------------------|-------------|-------------------|-------------------------|----------------|------------------------|---------------------|-----------------|----------------|---------------|--------------------------|
| 39                                             | NK1522      | Trichogrammatidae | Trichogramma dendrolimi | Russia         | Irkutsk Prov.          | Kachugskiy district | 28.VII.2020     | Astapenko S.A. | DSPAR038-22   | OR732453                 |
| 40                                             | NK1521      | Trichogrammatidae | Trichogramma dendrolimi | Russia         | Irkutsk Prov.          | Kachugskiy district | 28.VII.2020     | Astapenko S.A. | DSPAR037-22   | OR732455                 |
| 41                                             | NK1520      | Trichogrammatidae | Trichogramma dendrolimi | Russia         | Irkutsk Prov.          | Kachugskiy district | 28.VII.2020     | Astapenko S.A. | DSPAR036-22   | OR732435                 |
| 42                                             | NK1519      | Trichogrammatidae | Trichogramma dendrolimi | Russia         | Irkutsk Prov.          | Kachugskiy district | 28.VII.2020     | Astapenko S.A. | DSPAR035-22   | OR732466                 |
| <b>DIPTERA</b>                                 |             |                   |                         |                |                        |                     |                 |                |               |                          |
| 43                                             | NK1526      | Tachinidae        | Exorista larvarum       | Russia         | Tyva Rep.              | Ishtii-Khem village | 01.VIII.1963    | Kondakov Yu.P. | DSPAR042-22   | OR732432                 |
| 44                                             | NK1531      | Tachinidae        | Masicera sphingivora    | Russia         | Tyva Rep.              | Ishtii-Khem village | 18.III.1964     | Kondakov Yu.P. | DSPAR047-22   | OR732434                 |
| 45                                             | NK1530      | Tachinidae        | Masicera sphingivora    | Russia         | Tyva Rep.              | Ishtii-Khem village | 15.IV.1964      | —              | DSPAR046-22   | OR732456                 |
| 46                                             | NK1529      | Tachinidae        | Masicera sphingivora    | Russia         | Tyva Rep.              | Ishtii-Khem village | 20.III.1964     | —              | DSPAR045-22   | OR732421                 |
| 47                                             | NK1528      | Tachinidae        | Masicera sphingivora    | Russia         | Tyva Rep.              | Ishtii-Khem village | 13.III.1964     | Kondakov Yu.P. | DSPAR044-22   | OR732451                 |
| 48                                             | NK1527      | Tachinidae        | Masicera sphingivora    | Russia         | Tyva Rep.              | Ishtii-Khem village | 18.III.1964     | —              | DSPAR043-22   | OR732465                 |
| <b>SEQUENCES BORROWED FROM BOLD OR GENBANK</b> |             |                   |                         |                |                        |                     |                 |                |               |                          |
| <b>HYMENOPTERA</b>                             |             |                   |                         |                |                        |                     |                 |                |               |                          |
| 49                                             | KU682240    | Braconidae        | Aleiodes esenbeckii     | Spain          | —                      | —                   | —               | —              | GBMIN74556-17 | KU682240                 |
| 50                                             | MRS_JFT0716 | Braconidae        | Cotesia sp.             | United Kingdom | —                      | —                   | 15.VI.2016      | Shaw M.R.      | BCNCA261-18   | OR732419                 |

| No.            | Sample ID                 | Family            | Species                        | Country    | Administrative region*     | District                    | Collection Date | Collectors  | Process ID    | GenBank Accession Number |
|----------------|---------------------------|-------------------|--------------------------------|------------|----------------------------|-----------------------------|-----------------|-------------|---------------|--------------------------|
| 51             | KY421536                  | Braconidae        | Glyptapanteles liparidis       | Czech Rep. | —                          | —                           | —               | —           | GBMIN74375-17 | KY421536                 |
| 52             | MN521025                  | Encyrtidae        | Ooencyrtus sp. SAEVG Morph0251 | India      | —                          | —                           | 01.X.2015       | —           | GBMNC44807-20 | MN521025                 |
| 53             | INDOBIO SYS-CCDB25314-H11 | Perilampidae      | —                              | Indonesia  | Jawa Barat                 | —                           | 05.X.2015       | Schmidt S.  | BCIND760-16   | MH926749                 |
| 54             | BIOUG24698-E09            | Pteromalidae      | —                              | Canada     | Ontario                    | Guelph                      | 26.VIII.2014    | Meredith G. | GMOUF696-15   | MG380662                 |
| 55             | BIOUG17132-E12            | Scelionidae       | —                              | Canada     | Northwest Terr.            | Nahanni Nat. Park           | 04.VII.2014     | —           | CNNHB2693-14  | MG509194                 |
| 56             | BIOUG17632-B12            | Scelionidae       | —                              | Canada     | Northwest Terr.            | Nahanni Nat. Park           | 08.VIII.2014    | —           | CNNHG1972-14  | KR792756                 |
| 57             | MG932197                  | Trichogrammatidae | Trichogramma dendrolimi        | Italy      | —                          | —                           | —               | —           | GBMNA19717-19 | MG932197                 |
| 58             | MG932179                  | Trichogrammatidae | Trichogramma dendrolimi        | China      | —                          | —                           | 01.I.1992       | —           | GBMNA19713-19 | MG932179                 |
| <b>DIPTERA</b> |                           |                   |                                |            |                            |                             |                 |             |               |                          |
| 59             | AB700013                  | Tachinidae        | Exorista larvarum              | Japan      | Hokkaido-chiho             | Hokkaido                    | —               | —           | GBDP14050-13  | AB700013                 |
| 60             | BIOUG05974-D07            | Tachinidae        | Exorista larvarum              | Canada     | Saskatchewan               | Prince Albert National Park | 14.VII.2012     | —           | SSPAA2893-13  | KM913279                 |
| 61             | JP00410                   | Tachinidae        | Masicera silvatica             | France     | Provence-Alpes-Cote d'Azur | Hautes-Alpes                | 16.VII.2009     | Tschorsnig  | TACFI580-12   | KX843725                 |

| No.       | Sample ID | Family         | Species            | Country | Administrative region* | District                     | Collection Date | Collectors    | Process ID  | GenBank Accession Number |
|-----------|-----------|----------------|--------------------|---------|------------------------|------------------------------|-----------------|---------------|-------------|--------------------------|
| OUTGROUPS |           |                |                    |         |                        |                              |                 |               |             |                          |
| 1         | NK258     | Tenthredinidae | Profenusa thomsoni | Russia  | Novosibirsk Prov.      | Central Siberian Bot. garden | 10.VII.2012     | Kirichenko N. | ISSIK122-14 | KX360278                 |
| 2         | NK261     | Agromyzidae    |                    | Russia  | Novosibirsk Prov.      | Central Siberian Bot. garden | 05.VIII.2011    | Kirichenko N. | ISSIK125-14 | OP292611                 |

Remarks: \*States: Terr. – Territory, Prov. – Province, Rep. – Republic; — data are not available.
