# Supplementary material for: The Diversity of Parasitoids and Their Role in the Control of the Siberian Moth, Dendrolimus sibiricus (Lepidoptera: Lasiocampidae), a Major Coniferous Pest in Northern Asia
Source: MDPI journal article supplement (doi:10.3390/life14020268), 2024-02-17
Supplement: s1 [file s1]

# The Parasitoid Diversity and Their Role in the Control of the Siberian Moth, *Dendrolimus sibiricus* (Lepidoptera: Lasiocampidae), a Major Coniferous Pest in Northern Asia

Natalia I. Kirichenko, Alexander A. Ageev, Sergey A. Astapenko, Anna N. Golovina, Dmitry R. Kasparyan, Oksana V. Kosheleva, Alexander V. Timokhov, Ekaterina V. Tselikh, Evgeny V. Zakharov, Dmitrii L. Musolin, Sergey A. Belokobylskij

**Table S3.** The checklist of parasitoids associated with *Dendrolimus sibiricus* in Northern Asia.

| No.                             | Species of parasitoids <sup>1</sup>                                                                                                                 | Hosts range of parasitoids <sup>2</sup>                                                                                                                                                                                                                                                                                              | Abundance of parasitoids                               | Distribution                                                                                                             | References <sup>3</sup>                        |
|---------------------------------|-----------------------------------------------------------------------------------------------------------------------------------------------------|--------------------------------------------------------------------------------------------------------------------------------------------------------------------------------------------------------------------------------------------------------------------------------------------------------------------------------------|--------------------------------------------------------|--------------------------------------------------------------------------------------------------------------------------|------------------------------------------------|
| EGG PARASITIDS                  |                                                                                                                                                     |                                                                                                                                                                                                                                                                                                                                      |                                                        |                                                                                                                          |                                                |
| <b>Hymenoptera: Encyrtidae</b>  |                                                                                                                                                     |                                                                                                                                                                                                                                                                                                                                      |                                                        |                                                                                                                          |                                                |
| 1.                              | <i>Ooencyrtus pinicolus</i> (Matsumura, 1926)                                                                                                       | <i>Cosmotriche lobulina</i> (Denis et Schiffermüller), <i>Euthrix potatoria</i> (Linnaeus), <i>Dendrolimus superans</i> (Butler), <i>D. pini</i> (Linnaeus), <i>D. sibiricus</i> (Tschetverikov) (Lasiocampidae), Bombycidae, Erebidae (Lepidoptera)                                                                                 | Rare (Siberia), abundant (Far East)                    | Russia (South Ural, Western and Eastern Siberia, Far East), Kazakhstan, China, Japan                                     | [19,27,36,37,47,50,54,56,57,61,81,85,87,90,91] |
| <b>Hymenoptera: Scelionidae</b> |                                                                                                                                                     |                                                                                                                                                                                                                                                                                                                                      |                                                        |                                                                                                                          |                                                |
| 2.                              | <i>Telenomus dendrolimi</i> (Matsumura, 1925) (= <i>T. dendrolimusi</i> Chu, 1937)                                                                  | <i>Dendrolimus sibiricus</i> , <i>Dendrolimus spectabilis</i> Butler, <i>D. albolineatus</i> Matsumura, <i>D. punctatus</i> Walker (Lasiocampidae, Lepidoptera)                                                                                                                                                                      | Mass (56–94% Sakhalin, Kuril Islands, China)           | Russia (Sakhalin, Kuril Islands), Japan, China, Korea                                                                    | [47,61,76,91]                                  |
| 3.                              | <i>Telenomus tetratomus</i> (Thomson, 1861) (= <i>T. bombycis</i> Mayr, 1879, <i>T. gracilis</i> Mayr, 1879, <i>T. verticillatus</i> Kieffer, 1917) | <i>Dendrolimus pini</i> , <i>D. sibiricus</i> , <i>Macrothylacia rubi</i> (Linnaeus), <i>Lasiocampa trifolii</i> (Denis et Schiffermüller), <i>*Euthrix potatoria</i> , <i>*Eriogaster lanestris</i> (Linnaeus) (Lasiocampidae), <i>Calliteara abietis</i> (Denis et Schiffermüller) and <i>Orgyia antiqua</i> (Linnaeus) (Erebidae) | Rare (Buryatia), abundant (Krasnoyarsk), 50–80% (Amur) | Russia (European part, Western and Eastern Siberia, Far East), Europe, Kazakhstan, Mongolia, China, Japan, North America | [19,27,49,50,52–54,56,57,75,81,85,91]          |
| 4.                              | <i>Telenomus umbripennis</i> Mayr, 1879                                                                                                             | <i>Dendrolimus segregatus</i> Butler, <i>Dendrolimus sibiricus</i> (Lasiocampidae, Lepidoptera)                                                                                                                                                                                                                                      | No data                                                | Russia (Siberia), Europe                                                                                                 | [43,45,46,49,85]                               |

| No.                                   | Species of parasitoids <sup>1</sup>               | Hosts range of parasitoids <sup>2</sup>                                                                                                                                                                                                                                                                                                                     | Abundance of parasitoids | Distribution                                                                                                                                                                                                | References <sup>3</sup> |
|---------------------------------------|---------------------------------------------------|-------------------------------------------------------------------------------------------------------------------------------------------------------------------------------------------------------------------------------------------------------------------------------------------------------------------------------------------------------------|--------------------------|-------------------------------------------------------------------------------------------------------------------------------------------------------------------------------------------------------------|-------------------------|
| <b>Hymenoptera: Trichogrammatidae</b> |                                                   |                                                                                                                                                                                                                                                                                                                                                             |                          |                                                                                                                                                                                                             |                         |
| 5.                                    | <i>Trichogramma dendrolimi</i> Matsumura, 1926    | <i>Dendrolimus pini</i> , <i>D. punctatus</i> , <i>D. sibiricus</i> , <i>D. spectabilis</i> , <i>Lebeda nobilis</i> Walker, <i>Adela nobilis</i> Christoph, <i>Malacosoma neustria</i> (Linnaeus) (Lasiocampidae, Lep), <i>Deporaus betulae</i> (Linnaeus)) (Rhynchitidae, Coleoptera), <i>Acantholyda posticalis</i> Matsumura (Pamphiliidae, Hymenoptera) | Abundant                 | Russia (European part, Western, Eastern Siberia, Far East), Europe, Turkey, Iran, Pakistan, Kazakhstan, China, Korean Peninsula, Japan, India, southeast Asia, South America                                | [19,54,56,57,85]        |
| 6.                                    | <i>Trichogramma evanescens</i> Westwood, 1833     | Lepidoptera varia (incl. Lasiocampidae), Chrysomelidae, Curculionidae, Dermestidae, Rhynchitidae Tenebrionidae (Coleoptera), Anthomyiidae, Stratiomyiidae, Syrphidae, Tabanidae (Diptera).                                                                                                                                                                  | Abundant (China)         | Russia (European part, Western Siberia), Europe, North Africa, Georgia, Armenia, Azerbaijan, Turkey, Iran, Turkmenistan, Uzbekistan, Kazakhstan, China, North America, India, southeast Asia, South America | [61,85]                 |
| 7.                                    | <i>Trichogramma lingulatum</i> Pang et Chen, 1974 | <i>Dendrolimus sibiricus</i> (Lasiocampidae) and <i>Samia cynthia</i> (Drury) (Saturniidae) (Lepidoptera)                                                                                                                                                                                                                                                   | Rare                     | Russia (Amur), China, Japan                                                                                                                                                                                 | [24,27,85,90,91]        |
| 8.                                    | <i>Trichogramma semblidis</i> (Aurivillius, 1898) | Lepidoptera varia (incl. <i>Dendrolimus sibiricus</i> (Lasiocampidae)), Rhynchitidae, Curculionidae (Coleoptera), Anthomyiidae, Sciomyzidae and Tabanidae (Diptera)                                                                                                                                                                                         | No data                  | Russia (European part, Western Siberia), Europe, Syria, Iran, Kazakhstan, North America, India                                                                                                              | [19,85]                 |
| <b>Hymenoptera: Eupelmidae</b>        |                                                   |                                                                                                                                                                                                                                                                                                                                                             |                          |                                                                                                                                                                                                             |                         |
| 9.                                    | <i>Anastatus japonicus</i> Ashmead, 1904 *        | Lepidoptera varia (incl. <i>Dendrolimus sibiricus</i> , <i>Lymantria dispar</i> (Linnaeus) (Lasiocampidae)), Pentatomidae, Alydidae (Hemiptera); <b>parasitoids hosts</b> ( <i>Aleiodes esenbeckii</i> (Hartig) ssp. <i>dendrolimi</i> (Braconidae, Hymenoptera), <i>Ooencyrtus pityocampae</i> Mercet (Encyrtidae, Hymenoptera))                           | Rare                     | Russia (European part, Ural, Eastern Siberia, Far East), Europe, North Africa, Turkey, Uzbekistan, Kyrgyzstan, Kazakhstan, China, Korean Peninsula, Japan, North America (introduced), India                | [19,27,61,62,85,91]     |
| 10.                                   | <i>Mesocomys albitarsis</i> (Ashmead, 1904)       | Lepidoptera varia (incl. <i>Dendrolimus sibiricus</i> (Lasiocampidae)), Lymantriinae and Saturniidae                                                                                                                                                                                                                                                        | Rare                     | Russia (Primorskiy Territory), China, Korean Peninsula, Japan, southeast Asia                                                                                                                               | [61,85]                 |

| No.                              | Species of parasitoids <sup>1</sup>                                                                           | Hosts range of parasitoids <sup>2</sup>                                                                                                                                                                                                                                                                                                                                                                                                 | Abundance of parasitoids                        | Distribution                                                                                                                    | References <sup>3</sup>            |
|----------------------------------|---------------------------------------------------------------------------------------------------------------|-----------------------------------------------------------------------------------------------------------------------------------------------------------------------------------------------------------------------------------------------------------------------------------------------------------------------------------------------------------------------------------------------------------------------------------------|-------------------------------------------------|---------------------------------------------------------------------------------------------------------------------------------|------------------------------------|
| <b>Hymenoptera: Pteromalidae</b> |                                                                                                               |                                                                                                                                                                                                                                                                                                                                                                                                                                         |                                                 |                                                                                                                                 |                                    |
| 11.                              | <i>Euneura lachni</i> (Ashmead, 1887) *                                                                       | Lepidoptera varia (incl. <i>Dendrolimus sibiricus</i> (Lasiocampidae)), Aphididae, Aleyrodidae (Hemiptera), Syrphidae (Diptera); <b>parasitoids hosts</b> ( <i>Trichogramma dendrolimi</i> (Trichogrammatidae), <i>Pauesia</i> spp. (Braconidae (Hymenoptera)))                                                                                                                                                                         | No data                                         | Russia (Irkutsk, Sakhalin Island), Europe, Iran, Pakistan, Kyrgyzstan, China, Korean Peninsula, Japan, North America, India     | [61,85,95]                         |
| 12.                              | <i>Mesopolobus subfumatus</i> (Ratzeburg, 1852) *                                                             | Lasiocampidae (incl. <i>Dendrolimus sibiricus</i> ), Gracillariidae and Tortricidae (Lepidoptera), Diprionidae, Pamphiliidae (Hymenoptera); <b>parasitoids hosts</b> (Tachinidae (Diptera), Braconidae, Ichneumonidae and Scelionidae (Hymenoptera))                                                                                                                                                                                    | From rare (elsewhere) to abundant (Krasnoyarsk) | Russia (European part, Western, Eastern Siberia, Far East), Europe, China, Japan, N America                                     | [19,47,50,52,56,57,61,85,79]       |
| 13.                              | <i>Mesopolobus superansi</i> Yang et Gu, 1995                                                                 | <i>Dendrolimus sibiricus</i>                                                                                                                                                                                                                                                                                                                                                                                                            | No data                                         | Northeast China                                                                                                                 | [81]                               |
| 14.                              | <i>Pachyneuron solitarium</i> (Hartig, 1838) *                                                                | Lepidoptera varia (incl. <i>Cosmotriche lobulina</i> , <i>Dendrolimus kikuchii</i> Matsumura, <i>D. pini</i> , <i>D. sibiricus</i> , <i>D. spectabilis</i> , <i>D. superans</i> (Lasiocampidae )), Coccinellidae (Coleoptera), Asilidae (Diptera), Aphididae, Coccidae, Pseudococcidae, Psyllidae (Hemiptera); <b>parasitoids hosts</b> ( <i>Telenomus tetratomus</i> (Scelionidae); Aphelinidae, Braconidae, Encyrtidae (Hymenoptera)) | Mass                                            | Russia (Buryatia, Far East), Europe, Georgia, Kazakhstan, China, Korean Peninsula, Japan, India                                 | [19,50,56,57,61,81,85,95]          |
| <b>LARVAL ENDOPARASITIDS</b>     |                                                                                                               |                                                                                                                                                                                                                                                                                                                                                                                                                                         |                                                 |                                                                                                                                 |                                    |
| <b>Hymenoptera: Braconidae</b>   |                                                                                                               |                                                                                                                                                                                                                                                                                                                                                                                                                                         |                                                 |                                                                                                                                 |                                    |
| 15.                              | <i>Aleiodes</i> ( <i>Aleiodes</i> ) <i>esenbeckii</i> (Hartig, 1838) ssp. <i>dendrolimi</i> (Matsumura, 1926) | <i>Dendrolimus pini</i> , <i>D. punctatus</i> , <i>D. spectabilis</i> , <i>D. sibiricus</i> , <i>D. superans</i> , <i>D. tabulaeformis</i> Tsai et Liu, <i>Cosmotriche lobulina</i> (Lasiocampidae, Lepidoptera)                                                                                                                                                                                                                        | Abundant (Krasnoyarsk)                          | Russia (European part), Europe, Turkey, Iran, Afghanistan For ssp. <i>dendrolimi</i> : Russia (Western and Eastern Siberia, Far | [19,27,52,53,57,61,85,90,91,92,93] |

| No. | Species of parasitoids <sup>1</sup>                                   | Hosts range of parasitoids <sup>2</sup>                                                                                                                                                                                                                                                                                                   | Abundance of parasitoids         | Distribution                                                                                                                                                                                                        | References <sup>3</sup>            |
|-----|-----------------------------------------------------------------------|-------------------------------------------------------------------------------------------------------------------------------------------------------------------------------------------------------------------------------------------------------------------------------------------------------------------------------------------|----------------------------------|---------------------------------------------------------------------------------------------------------------------------------------------------------------------------------------------------------------------|------------------------------------|
|     |                                                                       |                                                                                                                                                                                                                                                                                                                                           |                                  | East), Mongolia, China Korean Peninsula, Japan                                                                                                                                                                      |                                    |
| 16. | <i>Cotesia ordinaria</i> (Ratzeburg, 1844) (=dendrolimi Mats.)        | <i>Dendrolimus pini</i> , <i>D. punctatus</i> , <i>D. spectabilis</i> , <i>D. sibiricus</i> , <i>D. superans</i> , <i>D. superans albolineatus</i> , <i>D. tabulaeformis</i> , <i>Macrothylacia rubi</i> (Lasiocampidae), <i>Amata palestinae</i> Hampson, (Erebidae) (Lepidoptera)                                                       | Rare                             | Russia (European part, Western and Eastern Siberia, south Far East), Europe, Turkey, Israel, Iran, Mongolia, China, Korean Peninsula, Japan                                                                         | [19,27,47,52,54,56,57,85,90,91,93] |
| 17. | <i>Cotesia prozorovi</i> * (Telenga, 1955)                            | <i>Dendrolimus superans</i> (Lasiocampidae, Lepidoptera)                                                                                                                                                                                                                                                                                  | No data                          | Russia (Eastern Siberia)                                                                                                                                                                                            | [85]                               |
| 18. | <i>Cotesia rubecula</i> (Marshall, 1885)                              | Macrolepidoptera (incl. Pieridae, Plutellidae)                                                                                                                                                                                                                                                                                            | No data                          | Russia (European part, Eastern Siberia, Far East), Europe, Iran, China, North America, Australia                                                                                                                    | [85]                               |
| 19. | <i>Cotesia rubripes</i> (Haliday, 1834)                               | Lepidoptera varia (incl. Geometridae, Lasiocampidae, Noctuidae, Notodontidae and Sphingidae)                                                                                                                                                                                                                                              | Mass<br>26-70%<br>(Tomsk)        | Russia (South European part of Russia, Western, Eastern Siberia, south Far East.), Europe, Morocco, Turkey, Kazakhstan, Mongolia, Korean Peninsula, Japan                                                           | [19,56,57,85]                      |
| 20. | <i>Glyptapanteles liparidis</i> (Bouche, 1834) (=Apanteles liparidis) | <i>Dendrolimus pini</i> , <i>D. punctatus</i> , <i>D. spectabilis</i> , <i>D. sibiricus</i> , <i>D. superans</i> , <i>D. superans albolineatus</i> , <i>D. tabulaeformis</i> , <i>Eriogaster lanestris</i> (Lasiocampidae), Erebidae, Notodontidae and Noctuidae (Lepidoptera)                                                            | Rare (Far East, Eastern Siberia) | Russia (European part, Western, Eastern Siberia, south Far East), Europe, Georgia, Armenia, Azerbaijan, North Africa, Iran, Kazakhstan, Mongolia, China, Korean Peninsula, Japan, India, North America (introduced) | [19,27,50,54,56,57,61,90,91,85,93] |
| 21. | <i>Meteorus versicolor</i> (Wesmael, 1835)                            | <i>Dendrolimus pini</i> , <i>D. spectabilis</i> , <i>D. sibiricus</i> , <i>Macrothylacia rubi</i> , <i>Malacosoma castrense</i> (Linnaeus), <i>M. neustria</i> , <i>M. parallela</i> Staudinger, <i>Selenophera lobulina</i> (Lasiocampidae)), Erebidae, Geometridae, Lymantriidae, Noctuidae, Nolidae, Notodontidae, and Thaumetopoeidae | No data                          | Russia (European part, Ural, Western, Eastern Siberia, Far East), Europe, Transcaucasia, Turkey, Israel, Palestine, Iran, Uzbekistan, Tajikistan, Kazakhstan, Mongolia, China,                                      | [85,93]                            |

| No.                               | Species of parasitoids <sup>1</sup>                                                  | Hosts range of parasitoids <sup>2</sup>                                                                                                                                                                                                                              | Abundance of parasitoids | Distribution                                                                             | References <sup>3</sup> |
|-----------------------------------|--------------------------------------------------------------------------------------|----------------------------------------------------------------------------------------------------------------------------------------------------------------------------------------------------------------------------------------------------------------------|--------------------------|------------------------------------------------------------------------------------------|-------------------------|
|                                   |                                                                                      | (Lepidoptera)                                                                                                                                                                                                                                                        |                          | Korea, Japan, North America                                                              |                         |
| <b>Hymenoptera: Ichneumonidae</b> |                                                                                      |                                                                                                                                                                                                                                                                      |                          |                                                                                          |                         |
| 22.                               | <i>Casinaria nigripes</i> (Gravenhorst, 1829)                                        | Lepidoptera varia (incl. <i>Dendrolimus superans sibiricus</i> , <i>D. pini</i> (Lasiocampidae), <i>Orgyia antiqua</i> , <i>Calliteara pudibunda</i> (Linnaeus) (Erebidae))                                                                                          | Rare                     | Russia (European part (Samara), Western, Eastern Siberia (Tomsk, Tyva)), Europe          | [19,24,27,91]           |
| 23.                               | <i>Dusona leptogaster</i> Holmgren, 1860                                             | Lepidoptera varia (incl. <i>Dendrolimus sibiricus</i> (Lasiocampidae))                                                                                                                                                                                               | Rare                     | Russia (Eastern Siberia (Irkutsk), Far East (South Kuril Is.)), Japan (Honshu)           | [52–54,56,57,61,90]     |
| 24.                               | <i>Dusona tenuis</i> (Förster, 1868) (= <i>Campoplex proximus</i> Förster, 1868)     | <i>Dendrolimus sibiricus</i> , <i>D. spectabilis</i> (Lasiocampidae, Lepidoptera)                                                                                                                                                                                    | No data                  | Russia (European part (Yaroslavl Prov.), Siberia). Europe, Azerbaijan, China, India      | [48,61]                 |
| 25.                               | <i>Hyposoter takagii</i> (Matsumura, 1926)                                           | Lepidoptera (varia)                                                                                                                                                                                                                                                  | Abundant                 | China                                                                                    | [27,47,91]              |
| 26.                               | <i>Hyposoter validus</i> (Pfankuch, 1921) (= <i>Anilasta valida</i> )                | <i>Dendrolimus sibiricus</i> (Lasiocampidae, Lepidoptera)                                                                                                                                                                                                            | Rare                     | Russia (Eastern, Western Siberia, Far East (Sakhalin)), Europa (Norway, Germany, Poland) | [19,24,90,93]           |
| 27.                               | <i>Mesochorus kuwayamae</i> Matsumura, 1926 *                                        | <i>Dendrolimus albolineatus</i> , <i>D. sibiricus</i> (Lasiocampidae, Lepidoptera); <b>parasitoids hosts</b> ( <i>Cotesia ordinaria</i> (Braconidae, Hymenoptera))                                                                                                   | No data                  | Russia (Far East), China, Japan                                                          | [47,85,90]              |
| 28.                               | <i>Opheltes glaucopterus</i> Linnaeus, 1758 (ssp. <i>apicalis</i> Matsumura, 1912) * | <i>Cimbex</i> (Cimbicidae, Hym), <i>Dendrolimus sibiricus</i> (Lasiocampidae, Lepidoptera) (as hyperparasitoid)                                                                                                                                                      | No data                  | Holarctic                                                                                | [61,74]                 |
| <b>LARVAL ECTOPARASITIDS</b>      |                                                                                      |                                                                                                                                                                                                                                                                      |                          |                                                                                          |                         |
| <b>Hymenoptera: Ichneumonidae</b> |                                                                                      |                                                                                                                                                                                                                                                                      |                          |                                                                                          |                         |
| 29.                               | <i>Acropimpla didyma</i> (Gravenhorst, 1829)                                         | Lepidoptera varia (incl. <i>Dendrolimus pini</i> , <i>Euthrix potatoria</i> , <i>Malacosoma neustria</i> (Lasiocampidae), <i>Lymantria dispar</i> (Limantriidae.), <i>Archanara dissoluta</i> (Treitschke), <i>Rhizedra lutosa</i> (Hübner) (Noctuidae, Lepidoptera) | No data                  | Russia (European part, Far East), Europe, Turkey, China, Japan                           | [24,27,73,85,91]        |
| 30.                               | <i>Acropimpla pictipes</i> (Gravenhorst, 1829)                                       | Lepidoptera varia (incl. Tortricidae, Oecophoridae, Momphidae, Gelechiidae,                                                                                                                                                                                          | No data                  | Russia (European part, south of Siberia and Far East), Europe,                           | [24,27,73,85,91]        |

| No.                                          | Species of parasitoids <sup>1</sup>                                                                               | Hosts range of parasitoids <sup>2</sup>                                                                                                                                                  | Abundance of parasitoids    | Distribution                                                                                                                                                   | References <sup>3</sup>               |
|----------------------------------------------|-------------------------------------------------------------------------------------------------------------------|------------------------------------------------------------------------------------------------------------------------------------------------------------------------------------------|-----------------------------|----------------------------------------------------------------------------------------------------------------------------------------------------------------|---------------------------------------|
|                                              |                                                                                                                   | Geometridae), <i>Anthonomus pomorum</i> (Linnaeus) (Curculionidae, Coleoptera)                                                                                                           |                             | Caucasus, Turkey, Kazakhstan, Mongolia, China, Japan                                                                                                           |                                       |
| 31.                                          | <i>Iseropus stercorator</i> (Fabricius, 1793)                                                                     | Lepidoptera varia (incl. Lasiocampidae, Noctuidae, Saturniidae, Sphingidae)                                                                                                              | Abundant (Krasnoyarsk)      | Russia (European part, Ural, Siberia, Far East), Europe, North Africa, Caucasus, Turkey, Iran, Central Asia, Kazakhstan, Mongolia, China, Japan, North America | [19,24,50,52–54,56,57,61,85,90,91,93] |
| 32.                                          | <i>Netelia</i> ( <i>Netelia</i> ) <i>melanura</i> (Thomson, 1888) (= <i>Paniscus testaceus</i> Gravenhorst, 1829) | <i>Dendrolimus sibiricus</i> (Lasiocampidae), <i>Acronicta tridens</i> Denis et Schiffermuller, <i>Drymonia ruficornis</i> (Hufnagel) (Noctuidae, Lepidoptera)                           | Rare                        | Russia (European part, Eastern Siberia, Far East), Europe, North Africa, Canary Islands, Georgia, Turkey, Uzbekistan, Japan                                    | [61,85]                               |
| <b>LARVAL OR LARVAL-PUPAL ENDOPARASITIDS</b> |                                                                                                                   |                                                                                                                                                                                          |                             |                                                                                                                                                                |                                       |
| <b>Diptera: Tachinidae</b>                   |                                                                                                                   |                                                                                                                                                                                          |                             |                                                                                                                                                                |                                       |
| 33.                                          | <i>Blepharipa pratensis</i> (Meigen, 1824) (= <i>scutellata</i> R.-D)                                             | Macrolepidoptera varia (incl. <i>Dendrolimus pini</i> L., <i>Dendrolimus superans sibiricus</i> , <i>Lymantria dispar</i> (Lasiocampidae))                                               | From rare to abundant (20%) | Russia (south of Siberia and Far East), Transcaucasia, Europe                                                                                                  | [19,22,24,27,56,86,91]                |
| 34.                                          | <i>Blepharipa schineri</i> (Mesnil, 1939)                                                                         | Macrolepidoptera varia (incl. <i>Lymantria dispar</i> , <i>Dendrolimus sibiricus</i> (Lasiocampidae), <i>Endromis versicolora</i> (Endromididae), Erebidae, Notodontidae, Lasiocampidae) | From rare to abundant       | Russia (European part, south of Siberia and Far East), China, Japan, Europe (to Germany)                                                                       | [19,22,24,27,57,86,91]                |
| 35.                                          | <i>Blepharipa zebina</i> (Walker, 1849)                                                                           | Macrolepidoptera (varia)                                                                                                                                                                 | No data                     | Russia (Primorsky Territory), Japan                                                                                                                            | [27,86,91]                            |
| 36.                                          | <i>Carcelia gnava</i> (Meigen, 1824)                                                                              | Lepidoptera varia (incl. <i>Malacosoma neustria</i> (Lasiocampidae), <i>Lymantriidae</i> , <i>Arctiidae</i> , <i>Notodontidae</i> , <i>Thyatiridae</i> )                                 | Rare                        | Russia (European part, Far East), Europe, Japan                                                                                                                | [22,86]                               |
| 37.                                          | <i>Carcelia matsukarehae</i> (Shima, 1969)                                                                        | <i>Dendrolimus superans sibiricus</i> , <i>Dendrolimus spectabilis</i> (Lasiocampidae, Lepidoptera)                                                                                      | Abundant (Amur)             | Russia (Primorsky Territory), Japan                                                                                                                            | [22,24,27,86,91]                      |
| 38.                                          | <i>Clemelis pullata</i> (Meigen,                                                                                  | Lepidoptera varia (incl. <i>Loxostege sticticalis</i>                                                                                                                                    | No data                     | Russia (European part, Western,                                                                                                                                | [22,26]                               |

| No. | Species of parasitoids <sup>1</sup>                    | Hosts range of parasitoids <sup>2</sup>                                                                                                       | Abundance of parasitoids                                             | Distribution                                                                                                                                                                               | References <sup>3</sup>               |
|-----|--------------------------------------------------------|-----------------------------------------------------------------------------------------------------------------------------------------------|----------------------------------------------------------------------|--------------------------------------------------------------------------------------------------------------------------------------------------------------------------------------------|---------------------------------------|
|     | 1824)                                                  | (Linnaeus) (Crambidae), <i>Dendrolimus sibiricus</i> (Lasiocampidae))                                                                         |                                                                      | Eastern Siberia), Europe, Transcaucasia, Israel, Central Asia, China, Mongolia                                                                                                             |                                       |
| 39. | <i>Compsilura concinnata</i> (Meigen, 1824)            | Lepidoptera varia (incl. <i>Dendrolimus sibiricus</i> (Lasiocampidae)), Tenthredinidae (Hymenoptera)                                          | Rare                                                                 | Russia (central and south European part, Transcaucasia, Europa, Central Asia, Israel, south of Siberia, Japan                                                                              | [22,24,27,86,91]                      |
| 40. | <i>Panzeria rudis</i> (Fallen, 1810) (=Ernestia rudis) | <i>Dendrolimus sibiricus</i> (Lasiocampidae), <i>Panolis flammea</i> (Denis et Schiffermuller), <i>Orthosia</i> spp. (Noctuidae, Lepidoptera) | Up to 100% (on <i>Dendrolimus pini</i> and <i>Lymantria dispar</i> ) | Russia (European part, south of Siberia, Far East), Europe, Japan, Mongolia, Tajikistan                                                                                                    | [22,49,86]                            |
| 41. | <i>Exorista larvarum</i> (Linnaeus, 1758)              | Lepidoptera varia (incl. <i>Dendrolimus sibiricus</i> (Lasiocampidae) and <i>Lymantria dispar</i> (Erebidae))                                 | From rare to abundant                                                | Russia (European part, Western, Eastern Siberia, south of Far East), Europe, Middle East, North Africa, Transcaucasia, Central Asia, Mongolia, Japan, India. Taiwan, Nearctic (introduced) | [19,22,24,26,27,52–54,56,61,67,86,91] |
| 42. | <i>Exorista fasciata</i> (Fallén, 1820)                | Lepidoptera varia (incl. Lymantriidae, Noctuidae, Arctiidae, Zygaenidae)                                                                      | Rare                                                                 | Russia (European part, Western, Eastern Siberia, south of Far East), Europe, Transcaucasia, Middle East, Mongolia, China, Taiwan                                                           | [19,22,24,27,50,54,56,57,61,86,89,91] |
| 43. | <i>Exorista segregata</i> (Rondani, 1859)              | Lepidoptera varia (incl. <i>Dendrolimus sibiricus</i> )                                                                                       | Rare                                                                 | Russia (European part, Western Siberia), Europe, Transcaucasia, North Africa, Middle East, Central Asia Mongolia                                                                           | [22,86,89]                            |
| 44. | <i>Hubneria affinis</i> (Fallén, 1810)                 | Lepidoptera (varia)                                                                                                                           |                                                                      | Russia (European part, Eastern Siberia), Europe, Transcaucasia, Mongolia, China                                                                                                            | [19,22,26,56,57,86]                   |
| 45. | <i>Lespesia frenchii</i> (Williston, 1889)             | Lepidoptera (varia)                                                                                                                           | Abundant                                                             | Russia (Siberia, Far East), North America.                                                                                                                                                 | [27,89,91]                            |

| No. | Species of parasitoids <sup>1</sup>                                                | Hosts range of parasitoids <sup>2</sup>                                                                                                                                          | Abundance of parasitoids                                              | Distribution                                                                                                                                                             | References <sup>3</sup>                |
|-----|------------------------------------------------------------------------------------|----------------------------------------------------------------------------------------------------------------------------------------------------------------------------------|-----------------------------------------------------------------------|--------------------------------------------------------------------------------------------------------------------------------------------------------------------------|----------------------------------------|
| 46. | <i>Linnaemya perinealis</i><br>Pandellé, 1895                                      | Lepidoptera (varia)                                                                                                                                                              | No data                                                               | Russia (European part, Siberia),<br>Europe, Kazakhstan, Mongolia,<br>China, Japan                                                                                        | [86,89]                                |
| 47. | <i>Masicera sphingivora</i><br>(Robineau-Desvoidy, 1830)<br>(= <i>zimini</i> Kol.) | Lepidoptera varia (incl. <i>Dendrolimus sibiricus</i><br>(Lasiocampidae), Geometridae, Erebidae,<br>Sphingidae, Noctuidae, Lymantriidae)                                         | From rare<br>(Buryatia) to<br>abundant<br>(other parts of<br>Siberia) | Russia (European, Siberia, south<br>Far East, Western Russia), Europe,<br>Transcaucasia, Central Asia,<br>Japan, Iran, Mongolia                                          | [19,22,27,50,53,54,56,57<br>,61,86,89] |
| 48. | <i>Macroprosopa atrata</i> (Fallén,<br>1810)                                       | Lepidoptera                                                                                                                                                                      | No data                                                               | Russia (European part, Siberia),<br>Europe, Transcaucasia, Mongolia                                                                                                      | [89]                                   |
| 49. | <i>Mikia tepens</i> (Walker, 1849)<br>(= <i>M. magnifica</i> )                     | Macrolepidoptera varia (incl. <i>Dendrolimus<br/>superans sibiricus</i> , <i>Dendrolimus pini</i> L.,<br>(Lasiocampidae), <i>Lymantria monacha</i> (Linnaeus)<br>(Limantriidae)) | From rare to<br>abundant                                              | Russia (Western, Eastern Siberia,<br>south of Far East), Europe,<br>Kazakhstan, China, Japan, India,<br>Malaysia, Vietnam                                                | [19,22,24,26,56,57,86,91<br>]          |
| 50. | <i>Pales pavida</i> (Meigen, 1824)                                                 | Macrolepidoptera (varia), some<br>Microlepidoptera.                                                                                                                              | Rare                                                                  | Russia (European part, south of<br>Western and Eastern Siberia,<br>south of Far East), Europe,<br>Transcaucasia, Central Asia,<br>Middle East, Mongolia, China,<br>Japan | [19,22,24,26,27,56,57,86<br>,91]       |
| 51. | <i>Picconia incurva</i><br>(Zetterstedt, 1844)                                     | Lepidoptera (varia)                                                                                                                                                              | No data                                                               | Russia (Eastern Siberia), Europe,<br>Transcaucasia, Iran, Israel,<br>Turkmenistan, Mongolia                                                                              | [89]                                   |
| 52. | <i>Pseudogonia rufifrons</i><br>(Wiedemann, 1830)                                  | Lepidoptera (varia)                                                                                                                                                              | No data                                                               | Widespread in Palearctic,<br>Oriental, Australasian and<br>Afrotropical regions                                                                                          | [89]                                   |
| 53. | <i>Senometopia excisa</i> (Fallén,<br>1820)                                        | Lepidoptera varia (incl. <i>Dendrolimus sibiricus</i> ,<br><i>D. superans albolineatus</i> (Lasiocampidae),<br>Notodontidae, Noctuidae, Geometridae,<br>Nymphalidae)             | Rare                                                                  | Russia (European part, Far East),<br>Europe, Japan                                                                                                                       | [22,86]                                |
| 54. | <i>Tachina grossa</i> (Linnaeus,                                                   | Lepidoptera varia (incl. Lymantriidae,                                                                                                                                           | Rare                                                                  | Russia (European part, Western,                                                                                                                                          | [19,22,27,50,54,56,57,61               |



| No.                                | Species of parasitoids <sup>1</sup>                            | Hosts range of parasitoids <sup>2</sup>                                                                                                                                                                 | Abundance of parasitoids | Distribution                                                                                                                                    | References <sup>3</sup> |
|------------------------------------|----------------------------------------------------------------|---------------------------------------------------------------------------------------------------------------------------------------------------------------------------------------------------------|--------------------------|-------------------------------------------------------------------------------------------------------------------------------------------------|-------------------------|
|                                    | 1758)                                                          | Lasiocampidae, Sphingidae)                                                                                                                                                                              |                          | Eastern Siberia, south Far East (Amur)), Europe, Transcaucasia, C. Asia, Kazakhstan, Mongolia, China                                            | ,86,89,91]              |
| 55.                                | <i>Tachina nupta</i> (Rondani, 1859)                           | Lepidoptera (varia)                                                                                                                                                                                     | Rare                     | Russia (European part, Western, Eastern Siberia, south Far East), Europe, Transcaucasia, Central Asia, China, Mongolia, Japan, Korean Peninsula | [22,27,89,91]           |
| 56.                                | <i>Thelaira nigripes</i> (Fabricius, 1794)                     | Macrolepidoptera varia (incl. <i>Dendrolimus sibiricus</i> (Lasiocampidae), Arctiidae, Noctuidae)                                                                                                       | Rare                     | Russia (European part, Western, Eastern Siberia, south Far East), Europe, Transcaucasia, China, Japan, Taiwan                                   | [22,26]                 |
| 57.                                | <i>Tachina magna</i> (Giglio-Tos, 1890)                        | Macrolepidoptera varia (incl. Limantriidae, Notodontidae)                                                                                                                                               | Rare                     | Russia (European part, south Ural, Eastern Siberia, south of Far East), Europe, Transcaucasia, China, Japan, Taiwan                             | [22,26,56,61,86]        |
| 58.                                | <i>Winthemia venusta</i> (Meigen, 1824)                        | Lepidoptera varia (incl. Notodontidae, Geometridae)                                                                                                                                                     | No data                  | Russia (European part, Eastern Siberia, south Far East), Europe, Transcaucasia, China, Japan, Taiwan                                            | [26,27,86,91]           |
| <b>Hymenoptera: Ichneumonidae:</b> |                                                                |                                                                                                                                                                                                         |                          |                                                                                                                                                 |                         |
| 59.                                | <i>Achais oratorius oratorius</i> (Fabricius, 1793)            | <i>Dendrolimus sibiricus</i> , <i>Dendrolimus spectabilis</i> (Lasiocampidae, Lepidoptera)                                                                                                              | No data                  | Russia (European part of Russia, Siberia, Far East), Europe, Azerbaijan                                                                         | [47,90]                 |
| 60.                                | <i>Diphyus amatorius</i> (Müller, 1776)                        | Lepidoptera varia (incl. <i>Dendrolimus sibiricus</i> (Lasiocampidae ), Geometridae, Noctuidae)                                                                                                         | No data                  | Russia (European part of Russia, Siberia, south Far East. Europe, Turkey, Azerbaijan, China, Japan                                              | [47,90]                 |
| 61.                                | <i>Habronyx heros</i> (Wesmael, 1849) (= <i>gigas</i> Kriech.) | Lepidoptera varia (incl. <i>Dendrolimus pini</i> , <i>D. punctatus</i> , <i>D. spectabilis</i> , <i>D. sibiricus</i> , <i>D. superans</i> , <i>D. superans albolineatus</i> , <i>Lasiocampa quercus</i> | Rare                     | Russia (European part, south of Siberia and Far East), Europe, Turkey, Israel, China, Korean                                                    | [19,27,52,85,91,93]     |

| No.                                   | Species of parasitoids <sup>1</sup>                             | Hosts range of parasitoids <sup>2</sup>                                                                                                                                                                                                                            | Abundance of parasitoids                         | Distribution                                                                                                                                                            | References <sup>3</sup>      |
|---------------------------------------|-----------------------------------------------------------------|--------------------------------------------------------------------------------------------------------------------------------------------------------------------------------------------------------------------------------------------------------------------|--------------------------------------------------|-------------------------------------------------------------------------------------------------------------------------------------------------------------------------|------------------------------|
|                                       |                                                                 | (Linnaeus), <i>Macrothylacia rubi</i> , <i>Pachypasa otus</i> (Drury) (Lasiocampidae), Noctuidae, Sphingidae)                                                                                                                                                      |                                                  | Peninsula, Japan                                                                                                                                                        |                              |
| 62.                                   | <i>Lymantrichneumon disparis segmentalia</i> (Uchida, 1936)     | Lymantriidae (Lepidoptera)                                                                                                                                                                                                                                         | No data                                          | Russia (Far East), China, Korean Peninsula, Japan                                                                                                                       | [90]                         |
| 63.                                   | <i>Therion circumflexum</i> (Linnaeus, 1758)                    | Lepidoptera varia (incl. <i>Dendrolimus pini</i> , <i>D. spectabilis</i> , <i>D. sibiricus</i> , <i>D. superans</i> , <i>D. superans albolineatus</i> , <i>Lasiocampa trifolii</i> (Lasiocampidae), Erebidae, Geometridae, Noctuidae, Notodontidae and Sphingidae) | No data                                          | Russia (European part, Ural, Eastern Siberia, Far East), Europe, North Africa, Caucasus, Turkey, Israel, Mongolia, China, Korean Peninsula, Japan, India, North America | [47,50,85,93]                |
| 64.                                   | <i>Therion giganteum</i> (Gravenhorst, 1829)                    | Lepidoptera varia (incl. <i>Dendrolimus</i> spp., <i>Gastropacha</i> sp., <i>Lasiocampa</i> spp. (Lasiocampidae), <i>Lycophotia</i> sp. and <i>Pseudaletia</i> sp. (Noctuidae))                                                                                    | From rare (Buryatia) to abundant (Far East)      | Russia (south European part, Western, Eastern Siberia, south Far East), Europe, North Africa, Caucasus, China                                                           | [19,24,47,52–54,56,57,85,90] |
| LARVAL OR LARVAL-PUPAL ENDOPARASITIDS |                                                                 |                                                                                                                                                                                                                                                                    |                                                  |                                                                                                                                                                         |                              |
| 65.                                   | <i>Delomerista mandibularis</i> (Gravenhorst, 1829) *           | <i>Dendrolimus sibiricus</i> (Lasiocampidae, Lepidoptera), Tenthredinidae (Hymenoptera); <b>parasitoids hosts</b> ( <i>Aleiodes</i> ( <i>Aleiodes</i> ) <i>esenbeckii</i> ssp. <i>dendrolimi</i> (Braconidae, Hymenoptera))                                        | Abundant (one of the main secondary parasitoids) | Russia (European part, Ural, south of Western, Eastern Siberia and Far East), Europe, Turkey, Japan, North America                                                      | [19,50,51,73,85]             |
| Hymenoptera:Eurytomidae               |                                                                 |                                                                                                                                                                                                                                                                    |                                                  |                                                                                                                                                                         |                              |
| 66.                                   | <i>Eurytoma rosae</i> Nees, 1834 *                              | Cecidomyiidae, Tephritidae (Diptera), Cynipidae (Hymenoptera), Tortricidae, Arctiidae (Lepidoptera); <b>parasitoids hosts</b> ( <i>Aleiodes esenbeckii</i> ssp. <i>dendrolimi</i> (Braconidae, Hymenoptera))                                                       | Rare                                             | Russia (European part, Western and Eastern Siberia, Far East), Europe, North Africa, Armenia, Turkey, Iran, Kazakhstan, China, South America                            | [19,56,57,61,85]             |
| Hymenoptera:Torymidae                 |                                                                 |                                                                                                                                                                                                                                                                    |                                                  |                                                                                                                                                                         |                              |
| 67.                                   | <i>Monodontomerus aeneus</i> (Fonscolombe, 1832) (=obsoletus) * | Lepidoptera varia (incl. Arctiidae, Lasiocampidae, Lymantriidae, Pieridae, Tortricidae), Apidae, Diprionidae, Pamphiliidae,                                                                                                                                        | Abundant (Krasnoyarsk). One of the               | Russia (European part, Western and Eastern Siberia), Europe, Georgia, Azerbaijan, Iran,                                                                                 | [19,50,52,85]                |

| No.                              | Species of parasitoids <sup>1</sup>                                        | Hosts range of parasitoids <sup>2</sup>                                                                                                                                                                                                                                                                                                     | Abundance of parasitoids             | Distribution                                                                                                                                                                                                                   | References <sup>3</sup> |
|----------------------------------|----------------------------------------------------------------------------|---------------------------------------------------------------------------------------------------------------------------------------------------------------------------------------------------------------------------------------------------------------------------------------------------------------------------------------------|--------------------------------------|--------------------------------------------------------------------------------------------------------------------------------------------------------------------------------------------------------------------------------|-------------------------|
|                                  |                                                                            | Sphecidae, Tenthredinidae and Vespidae (Hymenoptera); <b>parasitoids hosts</b> ( <i>Therion giganteum</i> , <i>Casinaria nigripes</i> , <i>Hyposoter validus</i> (Ichneumonidae), <i>Aleiodes esenbeckii</i> ssp. <i>dendrolimi</i> (Braconidae), Chrysididae (Hymenoptera), Tachinidae (Diptera))                                          | most important secondary parasitoids | Kyrgyzstan, Kazakhstan, China, North and South America                                                                                                                                                                         |                         |
| <b>Hymenoptera: Eupelmidae</b>   |                                                                            |                                                                                                                                                                                                                                                                                                                                             |                                      |                                                                                                                                                                                                                                |                         |
| 68.                              | <i>Eupelmus</i> ( <i>Eupelmus</i> ) <i>microzonus</i> Forster, 1860 *      | Cynipidae, Eurytomidae (Hymenoptera), Apionidae, Bruchidae, Curculionidae (Coleoptera), Cecidomyiidae, Chloropidae, Tephritidae (Diptera), Lasiocampidae (incl. <i>Dendrolimus sibiricus</i> ), Psychidae, Pyralidae (Lepidoptera); <b>parasitoids hosts</b> ( <i>Aleiodes esenbeckii</i> ssp. <i>dendrolimi</i> (Braconidae, Hymenoptera)) | Rare                                 | Russia (European part, Western Siberia, Far East), Europe, North Africa, Caucasus, Turkey, Israel, United Arab Emirates, Iran, Afghanistan, Turkmenistan, Tajikistan, Uzbekistan, Kyrgyzstan, Kazakhstan, China, North America | [19,56,57,85]           |
| 69.                              | <i>Eupelmus</i> ( <i>Macroneura</i> ) <i>vesicularis</i> (Retzius, 1783) * | Coleoptera, Diptera, Hymenoptera and Lepidoptera; <b>parasitoids hosts</b> ( <i>Aleiodes esenbeckii</i> ssp. <i>dendrolimi</i> (Braconidae, Hymenoptera))                                                                                                                                                                                   | Rare                                 | Russia (European part, Western Siberia, Far East), Europe, N Africa, Georgia, Armenia, Turkey, Israel, Iran, Turkmenistan, Kazakhstan, China, North America, Australia                                                         | [19,56,57,85]           |
| <b>Hymenoptera: Perilampidae</b> |                                                                            |                                                                                                                                                                                                                                                                                                                                             |                                      |                                                                                                                                                                                                                                |                         |
| 70.                              | <i>Perilampus nitens</i> Walker, 1834 *                                    | <i>Dendrolimus sibiricus</i> (Lasiocampidae, Lepidoptera); <b>parasitoids hosts</b> ( <i>Aleiodes esenbeckii</i> ssp. <i>dendrolimi</i> (Braconidae, Hymenoptera), Tachinidae (Diptera))                                                                                                                                                    | Rare                                 | Russia (European part, Western Siberia, Far East), Europe                                                                                                                                                                      | [19,56,85]              |
| <b>Hymenoptera: Pteromalidae</b> |                                                                            |                                                                                                                                                                                                                                                                                                                                             |                                      |                                                                                                                                                                                                                                |                         |
| 71.                              | <i>Dibrachys microgastri</i> (Bouche, 1834) *                              | Araneae, Coleoptera, Dermaptera, Diptera, Hemiptera, Hymenoptera (Diprionidae, Tenthredinidae), Lepidoptera, Neuroptera; <b>parasitoids hosts</b> ( <i>Masicera sphingivora</i> (Tachinidae, Diptera), <i>Agria affinis</i> , <i>Sarcophaga</i>                                                                                             | Abundant                             | Russia (European part, W Siberia, Far East), Europe, N Africa, Turkey, Syria, Iran, Afghanistan, Pakistan, Turkmenistan, Tajikistan, Uzbekistan,                                                                               | [19,53,57,61,82,85]     |

| No.                             | Species of parasitoids <sup>1</sup>                                     | Hosts range of parasitoids <sup>2</sup>                                                                                                                                                                                                                                                                               | Abundance of parasitoids | Distribution                                                                                                                                                                             | References <sup>3</sup> |
|---------------------------------|-------------------------------------------------------------------------|-----------------------------------------------------------------------------------------------------------------------------------------------------------------------------------------------------------------------------------------------------------------------------------------------------------------------|--------------------------|------------------------------------------------------------------------------------------------------------------------------------------------------------------------------------------|-------------------------|
|                                 |                                                                         | <i>uliginosa</i> , <i>S. pseudoscoparia</i> (Sarcophagidae, Diptera), <i>Casinaria nigripes</i> , <i>Hyposoter validus</i> , <i>Theronia atalantae</i> (Ichneumonidae, Hymenoptera), <i>Aleiodes esenbeckii</i> ssp. <i>dendrolimi</i> (Braconidae, Hymenoptera))                                                     |                          | Kyrgyzstan, Kazakhstan, Mongolia, China, Korean Peninsula, Japan, N America, India, SE Asia, Afrotropics, South America, Australasia                                                     |                         |
| 72.                             | <i>Pteromalus kuwayamae</i> Matsumura, 1926 *                           | <i>Dendrolimus sibiricus</i> , <i>D. spectabilis</i> (Lasiocampidae, Lepidoptera); <b>parasitoids hosts</b> ( <i>Hyposoter takagii</i> (Ichneumonidae, Hymenoptera))                                                                                                                                                  | No data                  | Russia: Far East (Sakhalin)                                                                                                                                                              | [47]                    |
| 73.                             | <i>Pteromalus matsuyadorii</i> Matsumura, 1926 *                        | <i>Dendrolimus sibiricus</i> , <i>D. spectabilis</i> (Lasiocampidae, Lepidoptera)                                                                                                                                                                                                                                     | No data                  | Russia: Far East (Sakhalin)                                                                                                                                                              | [47]                    |
| <b>Hymenoptera: Chalcididae</b> |                                                                         |                                                                                                                                                                                                                                                                                                                       |                          |                                                                                                                                                                                          |                         |
| 74.                             | <i>Brachymeria fiskei</i> (Crawford, 1910) *                            | Lepidoptera varia (incl. <i>Dendrolimus sibiricus</i> (Lasiocampidae), Lymantriidae, Yponomeutidae); <b>parasitoids hosts</b> ( <i>Blepharipa schineri</i> (Tachinidae, Diptera))                                                                                                                                     | No data                  | China                                                                                                                                                                                    | [61]                    |
| 75.                             | <i>Brachymeria minuta</i> (Linnaeus, 1767) *                            | Lepidoptera varia (incl. Arctiidae, Gelechiidae, Hesperidae, Lasiocampidae, Lymantriidae, Pieridae, Tortricidae, Yponomeutidae); <b>parasitoids hosts</b> ( <i>Masicera sphingivora</i> , <i>Blepharipa pratensis</i> (Tachinidae, Diptera))                                                                          | Rare                     | Russia (European par, Ural, Western and Eastern Siberia, Far East), Europe, North Africa, Turkey, Syria, Israel, Iran, Uzbekistan, Kazakhstan, Japan, India, southeast Asia, Australasia | [19,54,56,57,61,85,90]  |
| <b>Hymenoptera:Torymidae</b>    |                                                                         |                                                                                                                                                                                                                                                                                                                       |                          |                                                                                                                                                                                          |                         |
| 76.                             | <i>Monodontomerus minor</i> (Ratzeburg, 1848) (Hymenoptera:Torymidae) * | Apidae, Cimbicidae Diprionidae (Hymenoptera), Lepidoptera, Diptera (Tachinidae); <b>parasitoids hosts</b> : ( <i>Masicera sphingivora</i> (= <i>Masicera zimini</i> Kolomiets, 1952) (Tachinidae, Diptera), <i>Aleiodes esenbeckii</i> ssp. <i>dendrolimi</i> (Braconidae), Ichneumonidae, Eurytomidae (Hymenoptera)) | Rare                     | Russia (European part, Eastern Siberia, South of Far East), Europe, Georgia, Turkey, Pakistan, Tajikistan, Kazakhstan, China, Korean Peninsula, Japan, N America, India                  | [19,85]                 |

| No.                               | Species of parasitoids <sup>1</sup>                                                    | Hosts range of parasitoids <sup>2</sup>                                                                                                                                                                                                                                                                                                                                                                                                                                                               | Abundance of parasitoids            | Distribution                                                                                                                               | References <sup>3</sup> |
|-----------------------------------|----------------------------------------------------------------------------------------|-------------------------------------------------------------------------------------------------------------------------------------------------------------------------------------------------------------------------------------------------------------------------------------------------------------------------------------------------------------------------------------------------------------------------------------------------------------------------------------------------------|-------------------------------------|--------------------------------------------------------------------------------------------------------------------------------------------|-------------------------|
| PUPAL ENDOPARASITIDS              |                                                                                        |                                                                                                                                                                                                                                                                                                                                                                                                                                                                                                       |                                     |                                                                                                                                            |                         |
| <b>Hymenoptera: Ichneumonidae</b> |                                                                                        |                                                                                                                                                                                                                                                                                                                                                                                                                                                                                                       |                                     |                                                                                                                                            |                         |
| 77.                               | <i>Apechthis capulifera</i><br>(Kriechbaumer, 1887)                                    | Lepidoptera varia (incl. Geometridae, Saturniidae, Lasiocampidae, Libyidae, Lymantriidae, Lycaenidae, Noctuidae, Pieridae, Papilionidae, Satyridae, etc.)                                                                                                                                                                                                                                                                                                                                             | Abundant                            | Russia (South of Siberia and Far East), Europe, Caucasus, Central Asia, China, Korean Peninsula, Japan                                     | [24,27,73,85,91]        |
| 78.                               | <i>Apechthis quadridentata</i> *<br>(Thomson, 1877) (= <i>Pimpla dendrolimi</i> Mats.) | Lepidoptera varia (incl. <i>Dendrolimus superans</i> , <i>Dendrolimus spectabilis</i> (Butler) (Lasiocampidae))                                                                                                                                                                                                                                                                                                                                                                                       | Rare                                | Russia (European part, Ural, south of Siberia and Far East) Europe, Caucasus, Turkey, Kazakhstan, Mongolia, China, Korean Peninsula, Japan | [47,61,73,85]           |
| 79.                               | <i>Apechthis compunctor</i><br>(Linnaeus, 1758)                                        | Lepidoptera varia (incl. Geometridae, Pieridae, Lasiocampidae, Lymantriidae)                                                                                                                                                                                                                                                                                                                                                                                                                          | Rare                                | Russia (European part, south of Siberia and Far East) Europe, Caucasus, Turkey, Central Asia, Kazakhstan                                   | [19,56,73,85]           |
| 80.                               | <i>Gregopimpla himalayensis</i><br>(Cameron, 1899) (= <i>Iseropus himalayensis</i> )   | Lepidoptera varia (incl. <i>Margaronia pyloalis</i> Wlk. (Pyralidae), <i>Dendrolimus punctatus</i> , <i>D. spectabilis</i> , <i>Malacosoma neustrium</i> , <i>Gastropacha quercifolia</i> Linnaeus (Lasiocampidae), <i>Lymantria dispar</i> (Lymantriidae), <i>Clostera anastomosis</i> Linnaeus (Notodontidae), <i>Grapholita molesta</i> Busck, <i>Leguminivora glycinivorella</i> Matsumura, <i>Archips oporanus</i> Linnaeus (Tortricidae), <i>Ectomyelois pyrivorella</i> Matsumura (Pyralidae)) | No data                             | Russia (Far East), China, Korean Peninsula, Japan, India                                                                                   | [27,73,85,90,91]        |
| 81.                               | <i>Itoplectis tabatai</i> * (Uchida, 1930)                                             | <i>Dendrolimus superans</i> , <i>Dendrolimus sibiricus</i> (Lasiocampidae, Lepidoptera)                                                                                                                                                                                                                                                                                                                                                                                                               | Rare                                | Russia (Far East)                                                                                                                          | [61,73,85]              |
| 82.                               | <i>Pimpla disparis</i> Viereck, 1911                                                   | Lepidoptera varia.                                                                                                                                                                                                                                                                                                                                                                                                                                                                                    | Rare; can be abundant and effective | Russia (Eastern Siberia, Far East), Mongolia, China, Korean Peninsula, Japan, North America (introduced), India                            | [27,61,85,91]           |

| No.                            | Species of parasitoids <sup>1</sup>                                    | Hosts range of parasitoids <sup>2</sup>                                                                                                                                                                                                                                                                                           | Abundance of parasitoids           | Distribution                                                                                                                                                                                                                   | References <sup>3</sup>      |
|--------------------------------|------------------------------------------------------------------------|-----------------------------------------------------------------------------------------------------------------------------------------------------------------------------------------------------------------------------------------------------------------------------------------------------------------------------------|------------------------------------|--------------------------------------------------------------------------------------------------------------------------------------------------------------------------------------------------------------------------------|------------------------------|
| 83.                            | <i>Pimpla pluto</i> Ashmead, 1906                                      | Lepidoptera varia (inc. <i>Dendrolimus sibiricus</i> )                                                                                                                                                                                                                                                                            | Rare                               | Russia (Western and Eastern Siberia, Far East), Kazakhstan, China, Korean Peninsula, Japan                                                                                                                                     | [61,85]                      |
| 84.                            | <i>Pimpla rufipes</i> (Miller, 1759)<br>( <i>Pimpla instigator</i> F.) | Lepidoptera (varia)                                                                                                                                                                                                                                                                                                               | From rare to abundant<br>(Siberia) | Russia (European part, Ural, Western and Eastern Siberia, Far East), Europe, North Africa, Caucasus, Turkey, Iran, Afghanistan, Central Asia, Kazakhstan, Mongolia, China, Korean Peninsula, Japan, North America (introduced) | [19,27,52,54,56,61,85,90,91] |
| 85.                            | <i>Pimpla turionellae</i> (Linnaeus, 1758) *                           | Lepidoptera varia (incl. Choreutidae, Erebidae, Geometridae, Tortricidae, Yponomeutidae etc.);<br><b>parasitoids hosts</b> ( <i>Dusona leptogaster</i> (Ichneumonidae, Hymenoptera))                                                                                                                                              | Rare                               | Russia (European part, Ural, W, S Siberia, Far East), Europe, N Africa, Caucasus, Turkey, Israel, Iran, Afghanistan, Central Asia, Kazakhstan, Mongolia, China, Korean Peninsula, Japan, North America (introduced), India     | [19,57,85,90]                |
| 86.                            | <i>Theronia atalantae gestator</i> (Thunberg, 1822)                    | Lepidoptera varia (incl. <i>Dendrolimus sibiricus</i> , <i>D. superans</i> , <i>D. spectabilis</i> , <i>D. punctatus</i> , <i>D. tabulaeformis</i> , <i>Limantria dispar</i> (Limantriidae), <i>Hyphantria cunea</i> (Erebidae), <i>Pieris rapae</i> (Pieridae))                                                                  | No data                            | Russia (Eastern Siberia, Far East), China, Korean Peninsula, Japan, India                                                                                                                                                      | [24,85,90]                   |
| 87.                            | <i>Theronia atalantae atalantae</i> (Poda, 1761) *                     | Lepidoptera (varia); <b>parasitoids hosts</b> ( <i>Therion giganteum</i> , <i>Habronyx heros</i> , <i>Hyposoter validus</i> , <i>Casinaria nigripes</i> , <i>Iseropus stercorator</i> , (Ichneumonidae), <i>Aleiodes esenbeckii</i> ssp. <i>dendrolimi</i> (Braconidae) (Hymenoptera), <i>Mikia tepens</i> (Tachinidae, Diptera)) | From rare (Buryatia) to abundant   | Russia (European part, Siberia), Europe, Caucasus, Turkey, Iran, Turkmenistan, North America                                                                                                                                   | [19,24,38,50,53,56,57,61,85] |
| <b>Hymenoptera: Eulophidae</b> |                                                                        |                                                                                                                                                                                                                                                                                                                                   |                                    |                                                                                                                                                                                                                                |                              |
| 88.                            | <i>Aprostocetus xanthopus</i> (Nees, 1834)                             | Lasiocampidae (incl. <i>Dendrolimus superans sibiricus</i> ), Lymantriidae (Lepidoptera), Scolytinae                                                                                                                                                                                                                              | Rare (Siberia)                     | Russia (European part, Eastern Siberia, Far East), Europe                                                                                                                                                                      | [19,54,56,57,61,85]          |

| No.                  | Species of parasitoids <sup>1</sup>                                                  | Hosts range of parasitoids <sup>2</sup>                                                                                                                                                                               | Abundance of parasitoids                | Distribution                                                     | References <sup>3</sup> |
|----------------------|--------------------------------------------------------------------------------------|-----------------------------------------------------------------------------------------------------------------------------------------------------------------------------------------------------------------------|-----------------------------------------|------------------------------------------------------------------|-------------------------|
| (Coleoptera)         |                                                                                      |                                                                                                                                                                                                                       |                                         |                                                                  |                         |
| PUPAL ECTOPARASITIDS |                                                                                      |                                                                                                                                                                                                                       |                                         |                                                                  |                         |
| 89.                  | <i>Glyphicnemis profligator</i> (Fabricius, 1775)                                    | <i>Dendrolimus sibiricus</i> (Lasiocampidae, Lepidoptera), <i>Diprion pini</i> , <i>Neodiprion sertifer</i> (Geoffroy) (Diprionidae), <i>Nematus</i> spp. (Tenthredinidae) (Hymenoptera)                              | Rare                                    | Russia (European part, Western Siberia, Far East), Europe, Japan | [38,61,90]              |
| 90.                  | <i>Gelis dendrolimi</i> (Matsumura, 1926)                                            | <i>Dendrolimus sibiricus</i> (Lepidoptera Lasiocampidae)                                                                                                                                                              | No data                                 | Russia (Sakhalin), Japan (Shikoku)                               | [47,90]                 |
| 91.                  | <i>Mesoleptus transversor</i> Thunberg, 1822 (= <i>Exolytus splendens</i> (Grav.)) * | Diptera, Lepidoptera (Lasiocampidae), Hymenoptera (Tenthredinidae); <b>parasitoids hosts:</b> <i>Sarcophaga (Robineauella) pseudoscoparia</i> (Kramer), <i>Sarcophaga uliginosa</i> (Kramer) (Sarcophagidae, Diptera) | Rare                                    | Russia (Eastern Siberia), Europe                                 | [19,38,54,56,61]        |
| 92.                  | <i>Phygadeuon subspinosus</i> Gravenhorst, 1829 (= <i>Ph. grandiceps</i> Thoms.) *   | Muscomorpha (Diptera); <b>parasitoids hosts</b> ( <i>Masicera sphingivora</i> (Tachinidae, Diptera))                                                                                                                  | Rare                                    | Russia (European part), Far East, Europe                         | [19,38,57,90]           |
| 93.                  | <i>Caenocryptus sexannulatus</i> Gravenhorst, 1829 *                                 | <i>Cydia pomonella</i> (Linnaeus) (Tortricidae), <i>Dendrolimus sibiricus</i> (Lasiocampidae) (Lepidoptera); <b>parasitoids hosts</b> ( <i>Aleiodes esenbeckii</i> ssp. <i>dendrolimi</i> (Braconidae, Hymenoptera))  | From rare (Europe) to abundant (Russia) | Russia (Caucasus, Western Siberia), Europe                       | [19,38,56,57]           |

Remarks: <sup>1</sup>hyperparasites; <sup>2</sup>Some parasitoids, which are associated with *D. sibiricus*, can also act as hyperparasites (attacking primary the parasitoids of *D. sibiricus*). For such parasitic insects, additional data on their hosts among parasitoids are provided, indicated under **parasitoids hosts**. <sup>3</sup>See the reference list in our paper.
