# Supplementary material for: The Diversity of Parasitoids and Their Role in the Control of the Siberian Moth, Dendrolimus sibiricus (Lepidoptera: Lasiocampidae), a Major Coniferous Pest in Northern Asia
Source: MDPI journal article supplement (doi:10.3390/life14020268), 2024-02-17
Supplement: s1 [file s1]

# The Parasitoid Diversity and Their Role in the Control of the Siberian Moth, *Dendrolimus sibiricus* (Lepidoptera: Lasiocampidae), a Major Coniferous Pest in Northern Asia

Natalia I. Kirichenko, Alexander A. Ageev, Sergey A. Astapenko, Anna N. Golovina, Dmitry R. Kasparyan, Oksana V. Kosheleva, Alexander V. Timokhov, Ekaterina V. Tselikh, Evgeny V. Zakharov, Dmitrii L. Musolin, Sergey A. Belokobylskij

**Table S2.** Parasitism of eggs, larvae, and pupae of *Dendrolimus sibiricus* in accordance to its population dynamics phases in Northern Asia.

## I. EGG PARASITISM

| Administrative region <sup>1</sup> ,<br>sampling year | Number of<br>collected<br>eggs | Parasitoid contribution to <i>D. sibiricus</i> egg mortality, % |                                    |                             |                                   |                                 | References <sup>2</sup> |                     |
|-------------------------------------------------------|--------------------------------|-----------------------------------------------------------------|------------------------------------|-----------------------------|-----------------------------------|---------------------------------|-------------------------|---------------------|
|                                                       |                                | <i>Telenomus<br/>tetratomus</i>                                 | <i>Trichogramma<br/>dendrolimi</i> | <i>Trichogramma<br/>sp.</i> | <i>Mesopolobus<br/>subfumatus</i> | <i>Ooencyrtus<br/>pinicolus</i> |                         | Total<br>parasitism |
| <i>D. sibiricus</i> population growth                 |                                |                                                                 |                                    |                             |                                   |                                 |                         |                     |
| Tuva Rep., 1962                                       | 2466                           | 19.20                                                           | 0                                  | 0.08                        | 0                                 | 0.08                            | 19.36                   | [23]                |
| Krasnoyarsk Ter., 2019                                | 3099                           | 5.70                                                            | 0                                  | 0.08                        | 0                                 | 0                               | 5.78                    | Our paper, 2024     |
| Buryatia Rep., 1958                                   | 3459                           | 0.08                                                            | 0.02                               | 0                           | 0                                 | 0                               | 0.10                    | [21]                |
| Amur Prov., 1982                                      | 2000                           | 44.30                                                           | 5.00                               | 0                           | 0                                 | 0.70                            | 50.00                   | [20]                |
| Primorsky Ter., 1991                                  | N/A                            | 19.00                                                           | 0                                  | 0                           | 0                                 | 0                               | 19.00                   | [20]                |
| <i>D. sibiricus</i> outbreak                          |                                |                                                                 |                                    |                             |                                   |                                 |                         |                     |
| Tomsk Prov., 1955                                     | N/A                            | N/A                                                             | N/A                                | N/A                         | N/A                               | N/A                             | 16.60                   | [20]                |
| Tomsk Prov., 1956                                     | 18727                          | 88.42                                                           | 0.81                               | 0.02                        | 0                                 | 0.05                            | 89.30                   | [19]                |
| Tomsk Prov., 1956                                     | 16737                          | 59.90                                                           | 16.90                              | 0.02                        | 0                                 | 0.01                            | 76.83                   | [19]                |
| Tomsk Prov., 1956                                     | N/A                            | 50.60                                                           | 0                                  | 0                           | 0                                 | 0                               | 50.60                   | [19]                |
| Tomsk Prov., 2018                                     | N/A                            | 30.00                                                           | 0                                  | 0                           | 0                                 | 0                               | 30.00                   | Our paper, 2024     |
| Krasnoyarsk Ter., 1946                                | 87885                          | 94.00                                                           | 0                                  | 0                           | 0                                 | 0                               | 94.00                   | [18]                |
| Krasnoyarsk Ter., 1965                                | 4805                           | 4.70                                                            | 0                                  | 0                           | 0                                 | 0.30                            | 5.00                    | [21]                |

| Administrative region <sup>1</sup> ,<br>sampling year | Number of<br>collected<br>eggs | Parasitoid contribution to <i>D. sibiricus</i> egg mortality, % |                                    |                             |                                   |                                 |                     | References <sup>2</sup> |
|-------------------------------------------------------|--------------------------------|-----------------------------------------------------------------|------------------------------------|-----------------------------|-----------------------------------|---------------------------------|---------------------|-------------------------|
|                                                       |                                | <i>Telenomus<br/>tetratomus</i>                                 | <i>Trichogramma<br/>dendrolimi</i> | <i>Trichogramma<br/>sp.</i> | <i>Mesopolobus<br/>subfumatus</i> | <i>Ooencyrtus<br/>pinicolus</i> | Total<br>parasitism |                         |
| Krasnoyarsk Ter., 1966                                | 5018                           | 6.80                                                            | 0                                  | 0                           | 0                                 | 2.13                            | 8.93                | [21]                    |
| Krasnoyarsk Ter., 1995                                | N/A                            | N/A                                                             | N/A                                | N/A                         | N/A                               | N/A                             | 32.00               | [14]                    |
| Krasnoyarsk Ter., 2017                                | 4652                           | 80.00                                                           | 3.10                               | 0                           | 0                                 | 0                               | 83.10               | Our paper, 2024         |
| Krasnoyarsk Ter., 2018                                | N/A                            | 100.00                                                          | 0                                  | 0                           | 0                                 | 0                               | 100.00              | Our paper, 2024         |
| Tuva Rep., 1947                                       | N/A                            | 17.70                                                           | 0                                  | 0                           | 0                                 | 0                               | 17.70               | [19]                    |
| Tuva Rep., 1958                                       | N/A                            | N/A                                                             | N/A                                | N/A                         | N/A                               | N/A                             | 54.40               | [20]                    |
| Tuva Rep., 1959                                       | 29090                          | 71.67                                                           | 1.74                               | 0                           | 0                                 | 2.04                            | 81.93               | [19]                    |
| Tuva Rep., 1960                                       | 8480                           | 45.93                                                           | 2.28                               | 0                           | 0                                 | 4.10                            | 52.31               | [19]                    |
| Tuva Rep., 1963                                       | 1689                           | 16.70                                                           | 0                                  | 0.10                        | 0                                 | 0.10                            | 16.90               | [23]                    |
| Tuva Rep., 1964                                       | 180315                         | 52.70                                                           | 0                                  | 0.20                        | 0                                 | 0.08                            | 52.98               | [23]                    |
| Tuva Rep., 1965                                       | 19593                          | 52.00                                                           | 0                                  | 0.10                        | 0                                 | 0.10                            | 52.20               | [23]                    |
| Tuva Rep., 1966                                       | 391                            | 65.50                                                           | 0                                  | 0                           | 0                                 | 0                               | 65.50               | [23]                    |
| Irkutsk Prov., 1949                                   | 3841                           | 64.07                                                           | 0                                  | 0.13                        | 0                                 | 0.07                            | 64.27               | [21]                    |
| Irkutsk Prov., 1951                                   | 768                            | 75.78                                                           | 3.5                                | 0                           | 0                                 | 5.08                            | 84.36               | [21]                    |
| Irkutsk Prov., 2020                                   | 7500                           | 54.00                                                           | 0                                  | 38.00                       | 0                                 | 0                               | 92.00               | Our paper, 2024         |
| Irkutsk Prov., 2022                                   | 13723                          | 14.40                                                           | 9.80                               | 0                           | 0                                 | 0                               | 24.20               | Our paper, 2024         |
| Buryatia Rep., 1967                                   | 4640                           | N/A                                                             | N/A                                | N/A                         | N/A                               | N/A                             | 98.60               | [21]                    |
| Amur Prov., 1983                                      | 5000                           | 45.00                                                           | 5.00                               | 0                           | 0                                 | 10                              | 60                  | [20]                    |
| Amur Prov., 1957                                      | 4500                           | 43.50                                                           | 5.00                               | 0                           | 0                                 | 1.50                            | 50                  | [20]                    |
| Primorsky Ter., 1975                                  | 6000                           | 0.10                                                            | 0                                  | 0                           | 0                                 | 51.00                           | 51.18               | [20]                    |
| Primorsky Ter., 1986                                  | N/A                            | 2.00                                                            | 1.00                               | 0                           | 0                                 | 61.00                           | 64.00               | [20]                    |
| <i>D. sibiricus</i> population decline                |                                |                                                                 |                                    |                             |                                   |                                 |                     |                         |
| Tomsk Prov., 1956                                     | N/A                            | N/A                                                             | N/A                                | N/A                         | N/A                               | N/A                             | 81.90               | [20]                    |
| Tomsk Prov., 2018                                     | N/A                            | 78.00                                                           | 0                                  | 0                           | 0                                 | 0                               | 78.00               | Our paper, 2024         |
| Krasnoyarsk Ter., 1957                                | N/A                            | N/A                                                             | N/A                                | N/A                         | N/A                               | N/A                             | 99.00               | [21]                    |
| Krasnoyarsk Ter., 1996                                | N/A                            | 80.90                                                           | 0                                  | 0                           | 0                                 | 0                               | 80.90               | [14]                    |
| Krasnoyarsk Ter., 2020                                | 182                            | 54.00                                                           | 0                                  | 0                           | 0                                 | 0                               | 54.00               | Our paper, 2024         |

| Administrative region <sup>1</sup> ,<br>sampling year | Number of<br>collected<br>eggs | Parasitoid contribution to <i>D. sibiricus</i> egg mortality, % |                                    |                             |                                   |                                 |                     | References <sup>2</sup> |
|-------------------------------------------------------|--------------------------------|-----------------------------------------------------------------|------------------------------------|-----------------------------|-----------------------------------|---------------------------------|---------------------|-------------------------|
|                                                       |                                | <i>Telenomus<br/>tetratomus</i>                                 | <i>Trichogramma<br/>dendrolimi</i> | <i>Trichogramma<br/>sp.</i> | <i>Mesopolobus<br/>subfumatus</i> | <i>Ooencyrtus<br/>pinicolus</i> | Total<br>parasitism |                         |
| Tuva Rep., 1948                                       | N/A                            | 56.00                                                           | 0                                  | 0                           | 0                                 | 0                               | 56.00               | [19,23]                 |
| Tuva Rep., 1950                                       | 14825                          | 7.22                                                            | 0.79                               | 0.02                        | 0                                 | 0.65                            | 8.68                | [19,23,55]              |
| Tuva Rep., 1959                                       | N/A                            | N/A                                                             | N/A                                | N/A                         | N/A                               | N/A                             | 90.30               | [20]                    |
| Irkutsk Prov., 1950                                   | N/A                            | 100.00                                                          | 0                                  | 0                           | 0                                 | 0                               | 100.00              | [21]                    |
| Irkutsk Prov., 1954                                   | 1964                           | 6.90                                                            | 0.20                               | 0                           | 0                                 | 0                               | 7.10                | [21]                    |
| Irkutsk Prov., 1955                                   | 918                            | 18.51                                                           | 0.65                               | 0                           | 0                                 | 0                               | 19.16               | [21]                    |
| Chita Prov., 1940                                     | N/A                            | 79.00                                                           | 0                                  | 0                           | 0                                 | 0                               | 79.00               | [21]                    |
| Amur Prov., 1990                                      | 8000                           | 74.00                                                           | 5.00                               | 0                           | 0                                 | 20.0                            | 99.00               | [20]                    |
| Amur Prov., 1958                                      | 4500                           | 80                                                              | 17.00                              | 0                           | 0                                 | 2.00                            | 99.00               | [21]                    |
| Rus. Far East, 1960                                   | N/A                            | 0                                                               | 0                                  | 0                           | 0                                 | 90                              | 90                  | [21]                    |
| Primorsky Ter., 1976                                  | 12000                          | 15.00                                                           | 0                                  | 0                           | 0                                 | 73.00                           | 95.4                | [20]                    |
| Primorsky Ter., 1996                                  | N/A                            | 93.00                                                           | 0                                  | 0                           | 0                                 | 0                               | 93.00               | [20]                    |
| <i>D. sibiricus</i> population depression             |                                |                                                                 |                                    |                             |                                   |                                 |                     |                         |
| Tomsk Prov., 1957                                     | N/A                            | N/A                                                             | N/A                                | N/A                         | N/A                               | N/A                             | 15.00               | [20]                    |
| Tomsk Prov., 1962                                     | 16                             | 62.50                                                           | 0                                  | 0                           | 0                                 | 0                               | 62.50               | [19]                    |
| Tuva Rep., 1961                                       | 246                            | 36.18                                                           | 0                                  | 0                           | 0                                 | 11.38                           | 47.56               | [23]                    |
| Irkutsk Prov.1940                                     | N/A                            | N/A                                                             | N/A                                | N/A                         | N/A                               | N/A                             | 5.00                | [21]                    |

Remarks: <sup>1</sup>Ter. – Territory, Prov. – Province, Rep. – Republic; N/A – data not available. <sup>2</sup>See the reference list in our paper.

## II. LARVA PARASITISM

| Administrative region <sup>1</sup> ,<br>sampling year | Number of<br>collected<br>larvae | Parasitoid contribution to <i>D. sibiricus</i> larval mortality, % |                              |                              |                                     |                                                                | Total<br>parasitism | References <sup>2</sup> |
|-------------------------------------------------------|----------------------------------|--------------------------------------------------------------------|------------------------------|------------------------------|-------------------------------------|----------------------------------------------------------------|---------------------|-------------------------|
|                                                       |                                  | <i>Aleiodes<br/>esenbeckii</i> *                                   | <i>Hyposoter<br/>validus</i> | <i>Cotesia<br/>ordinaria</i> | <i>Glyptapanteles<br/>liparidis</i> | <i>Cotesia<br/>rubripes</i> (= <i>Apanteles<br/>rubripes</i> ) |                     |                         |
| <i>D. sibiricus</i> population growth                 |                                  |                                                                    |                              |                              |                                     |                                                                |                     |                         |
| Tomsk Prov., 1955                                     | N/A                              | N/A                                                                | N/A                          | N/A                          | N/A                                 | 24.60                                                          | 25.10               | [19,20]                 |
| Tuva Rep., 1958                                       | N/A                              | N/A                                                                | N/A                          | N/A                          | N/A                                 | N/A                                                            | 0.50                | [20]                    |
| Buryatia Rep., 1958                                   | N/A                              | 30.00                                                              | 0                            | 0                            | 0                                   | 0                                                              | 30.00               | [21]                    |
| <i>D. sibiricus</i> outbreak                          |                                  |                                                                    |                              |                              |                                     |                                                                |                     |                         |
| Krasnoyarsk Ter., 1995                                | N/A                              | 24.00                                                              | 0                            | 0                            | 0                                   | 0                                                              | 24.00               | [14]                    |
| Buryatia Rep., 1959                                   | N/A                              | 41.00                                                              | 0                            | 0                            | 0                                   | 0                                                              | 41.00               | [21]                    |
| Buryatia Rep., 1960                                   | N/A                              | 65.00                                                              | 0                            | 0                            | 0                                   | 0                                                              | 65.00               | [21]                    |
| Irkutsk Prov., 2022                                   | 517                              | 0                                                                  | 0                            | 0.08                         | 0                                   | 0                                                              | 0.08                | Our data 2023           |
| Rus. Far East, 1962                                   | N/A                              | 10                                                                 | 0                            | 7.00                         | 0                                   | 0                                                              | 17.00               | [20]                    |
| Amur Prov., 1990                                      | N/A                              | 0                                                                  | 0                            | 0                            | 75.00                               | 0                                                              | 75.00               | [20]                    |
| <i>D. sibiricus</i> population decline                |                                  |                                                                    |                              |                              |                                     |                                                                |                     |                         |
| Tomsk Prov., 1956                                     | 851                              | 10.40                                                              | 0.30                         | 0                            | 0.20                                | 0                                                              | 10.90               | [19,20]                 |
| Tomsk Prov., 2018                                     | N/A                              | 5.00                                                               | 0                            | 20                           | 0                                   | 0                                                              | 25.00               | Our data 2023           |
| Krasnoyarsk Ter., 1946                                | 560                              | 34.00                                                              | 0                            | 0                            | 0                                   | 0                                                              | 34.00               | [55]                    |
| Krasnoyarsk Ter., 1965                                | 93                               | 3.30                                                               | 0                            | 23.70                        | 0                                   | 0                                                              | 27.00               | [21]                    |
| Krasnoyarsk Ter., 1996                                | N/A                              | 12.00                                                              |                              | 0.80                         | 0                                   | 0                                                              | 12.80               | [14]                    |
| Tuva Rep., 1950                                       | 1698                             | 0.30                                                               | 1.00                         | 0.02                         | 0                                   | 0                                                              | 1.32                | [19]                    |
| Irkutsk Prov., 2021                                   | N/A                              | 6.20                                                               | 0                            | 2.10                         | 0                                   | 0                                                              | 8.30                | Our data 2023           |
| <i>D. sibiricus</i> population depression             |                                  |                                                                    |                              |                              |                                     |                                                                |                     |                         |
| Tomsk Prov., 1957                                     | 162                              | 0                                                                  | 0                            | 0.60                         | 0.60                                | 0                                                              | 1.20                | [20]                    |
| Tomsk Prov., 1962                                     | 4                                | 0                                                                  | 0                            | 0                            | 25.00                               | 0                                                              | 25.00               | [19]                    |

| Administrative region <sup>1</sup> ,<br>sampling year | Number of<br>collected<br>larvae | Parasitoid contribution to <i>D. sibiricus</i> larval mortality, % |                              |                              |                                     |                                                                |                     | References <sup>2</sup> |
|-------------------------------------------------------|----------------------------------|--------------------------------------------------------------------|------------------------------|------------------------------|-------------------------------------|----------------------------------------------------------------|---------------------|-------------------------|
|                                                       |                                  | <i>Aleiodes<br/>esenbeckii</i> *                                   | <i>Hyposoter<br/>validus</i> | <i>Cotesia<br/>ordinaria</i> | <i>Glyptapanteles<br/>liparidis</i> | <i>Cotesia<br/>rubripes</i> (= <i>Apanteles<br/>rubripes</i> ) | Total<br>parasitism |                         |
| Krasnoyarsk Ter., 1966                                | N/A                              | 22.50                                                              | 0                            | 0                            | 0                                   | 0                                                              | 22.50               | [21]                    |
| Tuva Rep., 1958                                       | 246                              | 0.50                                                               | 1.50                         | 0                            | 0.50                                | 0                                                              | 2.50                | [19]                    |
| Tuva Rep., 1959                                       | 250                              | 0.80                                                               | 2.40                         | 0                            | 0.40                                | 0                                                              | 3.60                | [19]                    |
| Tuva Rep., 1960                                       | 100                              | 0                                                                  | 0                            | 2.00                         | 1.00                                | 0                                                              | 3.00                | [19]                    |
| Irkutsk Prov., 1949                                   | 1321                             | 63.97                                                              | 0                            | 0                            | 0                                   | 0                                                              | 63.97               | [21]                    |

Remarks: <sup>1</sup>Ter. – Territory, Prov. – Province, Rep. – Republic; N/A – data not available; \* Likely *Aleiodes esenbeckii* ssp. *dendrolimi*. <sup>2</sup>See the reference list in our paper.

### III. PUPA PARASITISM

| Administrative region <sup>1</sup> , sampling year | Number of collected pupae | Parasitoid contribution to <i>D. sibiricus</i> pupal mortality, % |                                                            |                     |                                                 |                              |                           |                        |                          |                    | Total parasitism | References <sup>2</sup> |
|----------------------------------------------------|---------------------------|-------------------------------------------------------------------|------------------------------------------------------------|---------------------|-------------------------------------------------|------------------------------|---------------------------|------------------------|--------------------------|--------------------|------------------|-------------------------|
|                                                    |                           | <i>Masicera Sphingi-vora</i> (=M. zimini)                         | <i>Agria affinis</i> (= <i>Pseudo-sarcophaga affinis</i> ) | <i>Exorista sp.</i> | <i>Therion giganteum</i> (=Exochilum giganteum) | <i>Iseropus sterco-rator</i> | <i>Pimpla instiga-tor</i> | <i>Habro-nyx heros</i> | <i>Blepha-ri-pa</i> spp. | <i>Tachina sp.</i> |                  |                         |
| <i>D. sibiricus</i> population growth              |                           |                                                                   |                                                            |                     |                                                 |                              |                           |                        |                          |                    |                  |                         |
| Tomsk Prov., 1955                                  | N/A                       | N/A                                                               | N/A                                                        | N/A                 | N/A                                             | N/A                          | N/A                       | N/A                    | N/A                      | N/A                | 13.30            | [20]                    |
| Tuva Rep., 1958                                    | N/A                       | N/A                                                               | N/A                                                        | N/A                 | N/A                                             | N/A                          | N/A                       | N/A                    | N/A                      | N/A                | 3.90             | [20]                    |
| Buryatia Rep., 1958                                | N/A                       | 1.36                                                              | 0                                                          | 0                   | 0                                               | 0                            | 0                         | 0                      | 0                        | 0                  | 1.36             | [21]                    |
| Primorsky Ter., 1985                               | N/A                       | 0                                                                 | 0                                                          | 0                   | 0                                               | 0                            | 0                         | 0                      | 10                       | 0                  | 10               | [20]                    |
| <i>D. sibiricus</i> outbreak                       |                           |                                                                   |                                                            |                     |                                                 |                              |                           |                        |                          |                    |                  |                         |
| Tomsk Prov., 1956                                  | 712                       | 0                                                                 | 2.00                                                       | 0.30                | 0.50                                            | 0.60                         | 0.10                      | 0.40                   | 0.90                     | 0                  | 4.80             | [19]                    |
| Krasnoyarsk Ter., 1957                             | N/A                       | 20.00                                                             | 0                                                          | 0                   | 0                                               | 0                            | 0                         | 0                      | 0                        | 0                  | 20.00            | [21]                    |
| Tuva Rep.,1950                                     | 12000                     | 66.60                                                             | 0                                                          | 0                   | 0                                               | 0                            | 0                         | 0                      | 0                        | 0                  | 66.60            | [19]                    |
| Tuva Rep., 1958                                    | N/A                       | 5.20                                                              | 0                                                          | 0                   | 0                                               | 0                            | 0                         | 0                      | 0                        | 0                  | 5.20             | [19]                    |
| Tuva Rep., 1959                                    | N/A                       | 21.70                                                             | 0                                                          | 0                   | 0                                               | 0                            | 0                         | 0                      | 0                        | 0                  | 21.70            | [19]                    |
| Tuva Rep., 1960                                    | 1225                      | 54.80                                                             | 2.10                                                       | 0.10                | 0.20                                            | 0.10                         | 0                         | 0                      | 0                        | 0                  | 57.30            | [19,23]                 |
| Irkutsk Prov., 1949                                | 646                       | 26.24                                                             | 0                                                          | 0                   | 0                                               | 0                            | 0                         | 0                      | 0                        | 0                  | 26.24            | [21]                    |
| Irkutsk Prov., 2021                                | N/A                       | 0                                                                 | 0                                                          | 0                   | 0.10                                            | 0                            | 0                         | 0                      | 0                        | 0                  | 0.10             | Our data 2023           |
| Irkutsk Prov., 2022                                | 679                       | 0                                                                 | 0                                                          | 0                   | 0                                               | 0.58                         | 0                         | 0                      | 0                        | 41.64              | 42.22            | Our data 2023           |
| Buryatia Rep., 1960                                | N/A                       | 1.30                                                              | 0                                                          | 0                   | 0                                               | 0                            | 0                         | 0                      | 0                        | 0                  | 1.30             | [21]                    |
| Primorsky Ter., 1986                               | N/A                       | 0                                                                 | 0                                                          | 0                   | 0                                               | 0                            | 0                         | 0                      | 40                       | 0                  | 40.00            | [20]                    |
| <i>D. sibiricus</i> population decline             |                           |                                                                   |                                                            |                     |                                                 |                              |                           |                        |                          |                    |                  |                         |
| Krasnoyarsk Ter., 1963                             | 18                        | 0                                                                 | 0                                                          | 0                   | 0                                               | 11.10                        | 0                         | 0                      | 0                        | 61.11              | 72.21            | [21]                    |
| Krasnoyarsk Ter.,                                  | 93                        | 0                                                                 | 0                                                          | 0                   | 0                                               | 1.10                         | 0                         | 0                      | 0                        | 9.60               | 10.70            | [21]                    |

| Administrative region <sup>1</sup> , sampling year | Number of collected pupae | Parasitoid contribution to <i>D. sibiricus</i> pupal mortality, % |                                                            |                     |                                                 |                              |                           |                        |                           |                    | References <sup>2</sup> |                    |
|----------------------------------------------------|---------------------------|-------------------------------------------------------------------|------------------------------------------------------------|---------------------|-------------------------------------------------|------------------------------|---------------------------|------------------------|---------------------------|--------------------|-------------------------|--------------------|
|                                                    |                           | <i>Masicera Sphingi-vora</i> (=M. zimini)                         | <i>Agria affinis</i> (= <i>Pseudo-sarcophaga affinis</i> ) | <i>Exorista sp.</i> | <i>Therion giganteum</i> (=Exochilum giganteum) | <i>Iseropus sterco-rator</i> | <i>Pimpla instiga-tor</i> | <i>Habro-nyx heros</i> | <i>Blepha -ri-pa</i> spp. | <i>Tachina sp.</i> |                         | Total para-sitis m |
| 1965                                               |                           |                                                                   |                                                            |                     |                                                 |                              |                           |                        |                           |                    |                         |                    |
| Tuva Rep., 1950                                    | 7697                      | 58.50                                                             | 2.10                                                       | 0.20                | 0                                               | 0.30                         | 0.01                      | 0                      | 0                         | 0                  | 61.11                   | [55]               |
| Irkutsk Prov.,1948                                 | 2944                      | N/A                                                               | N/A                                                        | N/A                 | N/A                                             | N/A                          | N/A                       | N/A                    | N/A                       | N/A                | 35.11                   | [21]               |
| Primorsky Ter., 1976                               | N/A                       | 0                                                                 | 0                                                          | 0                   | 0                                               | 0                            | 0                         | 0                      | 70                        | 0                  | 70                      | [20]               |
| Primorsky Ter., 1987                               | N/A                       | 0                                                                 | 0                                                          | 0                   | 0                                               | 0                            | 0                         | 0                      | 60                        | 0                  | 60                      | [20]               |
| <i>D. sibiricus</i> population depression          |                           |                                                                   |                                                            |                     |                                                 |                              |                           |                        |                           |                    |                         |                    |
| Tomsk Prov., 1957                                  | N/A                       | N/A                                                               | N/A                                                        | N/A                 | N/A                                             | N/A                          | N/A                       | N/A                    | N/A                       | N/A                | 58.10                   | [20]               |
| Tomsk Prov., 1957                                  | 240                       | 0                                                                 | 9.20                                                       | 6.70                | 7.10                                            | 1.70                         | 0.80                      | 12.10                  | 17.90                     | 0                  | 55.50                   | [19]               |
| Tuva Rep., 1960                                    | N/A                       | N/A                                                               | N/A                                                        | N/A                 | N/A                                             | N/A                          | N/A                       | N/A                    | N/A                       | N/A                | 60.90                   | [20]               |
| Tuva Rep., 1961                                    | 119                       | 31.20                                                             | 1.70                                                       | 2.50                | 2.50                                            | 0                            | 0                         | 0                      | 0                         | 0                  | 37.90                   | [19]               |
| Irkutsk Prov.,1949                                 | N/A                       | 31.00                                                             | 0                                                          | 0                   | 0                                               | 0                            | 0                         | 0                      | 0                         | 0                  | 31.00                   | [21]               |

Remarks: <sup>1</sup>Ter. – Territory, Prov. – Province, Rep. – Republic; N/A – data not available. <sup>2</sup>See the reference list in our paper.
